# Supplementary material for: Extremely twisted and bent pyrene-fused N-heterocyclic germylenes
Source: Royal Society of Chemistry journal article supplement (doi:10.1039/c9cc08703f), 2019-01-01
Supplement: c9cc08703f1.pdf [file c9cc08703f1.pdf]

## Extremely Twisted and Bent Pyrene-Fused N-Heterocyclic Germylenes

Kelsie E. Krantz,<sup>a</sup> Sarah L. Weisflog,<sup>a</sup> Wenlong Yang,<sup>a</sup> Diane A. Dickie,<sup>a</sup> Nathan C. Frey,<sup>b</sup> Charles Edwin Webster,<sup>b\*</sup> Robert J. Gilliard, Jr<sup>a\*</sup>

<sup>a</sup>Department of Chemistry, University of Virginia, 409 McCormick Rd., PO Box 400319, Charlottesville, VA 22904

<sup>b</sup>Department of Chemistry, Mississippi State University, Box 9573, Mississippi State, MS 39762

\*To whom correspondence should be addressed: [rjg8s@virginia.edu](mailto:rjg8s@virginia.edu), [ewebster@chemistry.msstate.edu](mailto:ewebster@chemistry.msstate.edu).

### Supporting Information

#### Table of Contents

|                               |     |
|-------------------------------|-----|
| General Procedures            | S2  |
| Experimental Procedures       | S2  |
| NMR Spectra                   | S4  |
| IR Spectra                    | S10 |
| X-ray Crystallography Data    | S13 |
| Reaction of <b>2</b> with MeI | S16 |
| Theoretical Calculations      | S17 |
| References                    | S40 |

## General Procedures

All manipulations involving air- and moisture-sensitive compounds were carried out under inert atmosphere of purified argon using an MBRAUN LABmaster glovebox equipped with a -37 °C freezer, or standard Schlenk line techniques. All solvents were purified by distillation over sodium and benzophenone. Glassware was oven-dried at 190 °C overnight. The NMR spectra were recorded at room temperature on a Bruker Advance 600 MHz spectrometer. Proton and carbon chemical shifts are reported in ppm and are referenced using the residual proton and carbon signals of the deuterated solvent ( $^1\text{H}$ ;  $\text{C}_6\text{D}_6$ ,  $\delta$  7.16;  $^{13}\text{C}$ ;  $\delta$  128.1 ppm). Single crystal X-ray diffraction data was collected on a Bruker Kappa APEXII diffractometer. The structures were solved and refined using the Bruker SHELXTL Software Package within APEX3 and OLEX2. The UV-visible spectra were recorded on a Cary 60 UV-vis Spectrophotometer with a resolution of 0.5 nm. Sample solutions were prepared in toluene in a 1 cm square air-free quartz cuvette. The IR spectra were recorded in the solid-state on a Cary 630 FTIR Spectrometer with attached Diamond ATR accessory. Deuterated solvents were purchased from Cambridge Isotope Laboratories. Suitable elemental analysis could not be obtained due to the reactivity of the products. The 1,3-bis(2,6-diisopropylphenyl)imidazolium chloride ( $\text{IPr}\cdot\text{HCl}$ ),<sup>1</sup> 4,5,9,10-tetrabromo-2,7-di-tert-butylpyrene,<sup>2</sup> and 1,3-diisopropyl-4,5-dimethylimidazol-2-ylidene ( $\text{sIPr}$ )<sup>3</sup> were prepared according to the literature procedure.

## Experimental Procedures

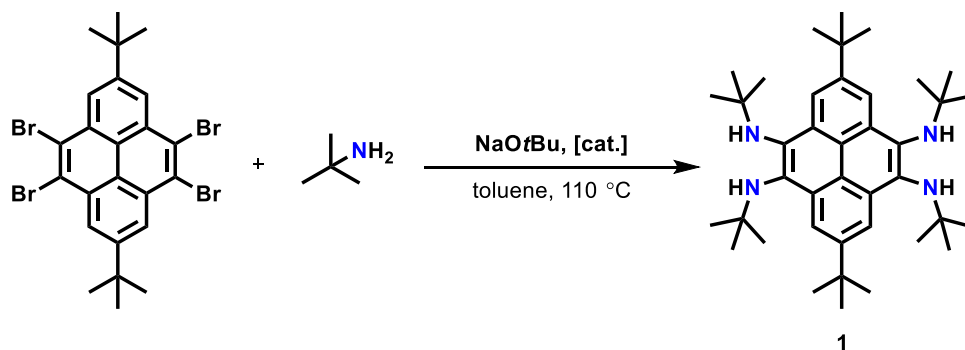

**Synthesis of Compound 1.** In a 50 mL flask, 1,3-bis(2,6-diisopropylphenyl)imidazolium chloride ( $\text{IPr}\cdot\text{HCl}$ , 0.471 g, 1.11 mmol),  $[\text{Pd}(\text{OAc})_2]$  (0.124 g, 0.554 mmol), and  $\text{NaOtBu}$  (0.160 g, 1.66 mmol) were stirred in 20 mL of toluene at room temperature for 1 hr until a clear orange solution was observed. In a Schlenk tube 4,5,9,10-tetrabromo-2,7-di-tert-butylpyrene (5.00 g, 7.91 mmol) and  $\text{NaOtBu}$  (3.65 g, 38.0 mmol) were dissolved in anhydrous toluene (100 mL). The previous solution was added to the Schlenk tube, and tert-butylamine (3.99 mL, 38.0 mmol) was added under positive argon pressure. The resulting dark orange solution was stirred at 110 °C for 16 hrs. The mixture was cooled to room temperature and filtered over celite. The solvent was removed from the filtrate to leave a dark orange solid. The crude solid was washed with hexanes (3 x 20 mL) to yield the pure yellow product (4.41 g, 93% yield). Colorless block-shaped crystals suitable for X-ray diffraction studies were obtained from a concentrated hexane solution at -37 °C.  $^1\text{H}$  NMR (600 MHz,  $\text{C}_6\text{D}_6$ , 298 K)  $\delta$  = 8.85 (s, 4H,  $\text{CH}_{\text{pyr}}$ ), 4.23 (br. s, 4H, NH), 1.65 (s, 18H,  $\text{C}(\text{CH}_3)_3$ ), 1.26 ppm (s, 36H,  $\text{N}(\text{C}(\text{CH}_3)_3)$ ).  $^{13}\text{C}\{^1\text{H}\}$  NMR (150.90 MHz,  $\text{C}_6\text{D}_6$ , 298 K)  $\delta$  = 146.3, 136.9, 132.1, 120.8, 119.6, 56.0, 35.9, 32.3, 31.8 ppm.

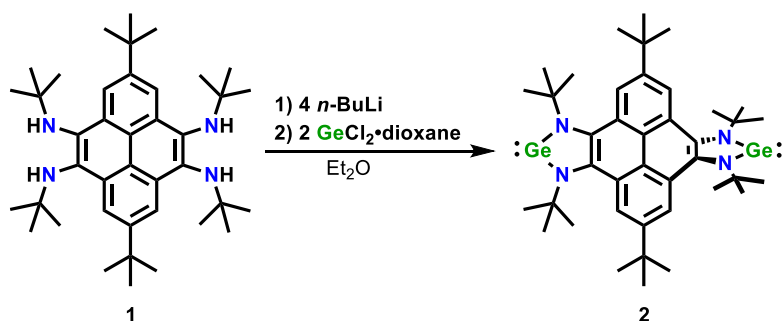

**Synthesis of Compound 2.** Compound **1** (1.00 g, 1.67 mmol) was dissolved in freshly distilled Et<sub>2</sub>O (10 mL) in a 100 mL Schlenk flask to yield a yellow solution. *n*-BuLi (2.5 M in hexanes, 2.84 mL, 7.02 mmol) was added dropwise under argon at -78 °C, and a color change to red was observed. The reaction was slowly warmed to room temperature and stirred for 22 hrs. The solvent was removed under reduced pressure, and the orange residue was redissolved in toluene (60 mL). GeCl<sub>2</sub>•dioxane (0.774 g, 3.34 mmol) was added, and the reaction was stirred for 17 hrs. The mixture was filtered over celite to leave a dark orange filtrate. The solvent was removed from the filtrate under reduced pressure to leave a dark orange solid. The crude solid was washed with hexane (3 x 10 mL) to leave the pure orange compound **2** (0.517 g, 46% yield). Yellow rod-shaped crystals suitable for X-ray diffraction studies were obtained from a concentrated toluene solution at -37 °C. <sup>1</sup>H NMR (600 MHz, C<sub>6</sub>D<sub>6</sub>, 298 K) δ = 8.50 (s, 4H, CH<sub>pyr</sub>), 1.85 (s, 36H, N(C(CH<sub>3</sub>)<sub>3</sub>)) 1.59 ppm (s, 18H, C(CH<sub>3</sub>)<sub>3</sub>). <sup>13</sup>C{<sup>1</sup>H} NMR (150.90 MHz, C<sub>6</sub>D<sub>6</sub>, 298 K) δ = 143.7, 136.8, 126.7, 117.2, 116.3, 59.3, 37.5, 36.4, 32.6 ppm. Anal. Calcd for C<sub>40</sub>H<sub>58</sub>Ge<sub>2</sub>H<sub>4</sub>: C, 64.91; H, 7.90; N, 7.57%. Found: C, 64.38; H, 8.14; N, 7.24%.

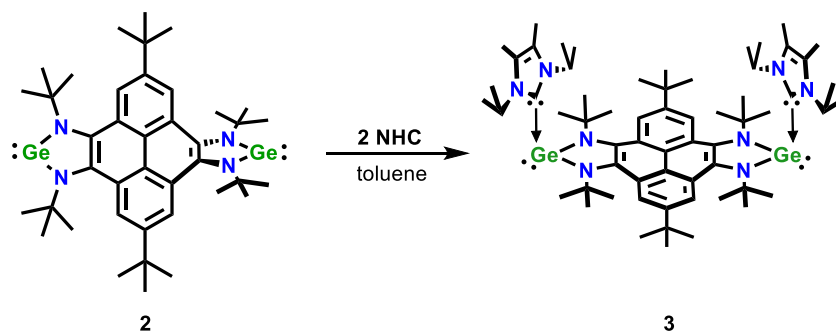

**Synthesis of Compound 3.** To a solution of compound **2** (0.200 g, 0.270 mmol) in toluene (25 mL), sIPr (0.0974 g, 0.540 mmol) was added. After addition, the reaction was stirred at room temperature for 3.5 hrs. The yellow precipitate was then collected through filtration and washed with hexane (3 x 5 mL), and the remaining solid was dried under reduced pressure to yield compound **3** (0.122 g, 41% yield). Yellow block-shaped crystals suitable for X-ray diffraction were obtained from a concentrated NMR sample in C<sub>6</sub>D<sub>6</sub>. <sup>1</sup>H NMR (600 MHz, C<sub>6</sub>D<sub>6</sub>, 298 K) δ = 8.57 (s, 4H, CH<sub>pyr</sub>), 6.68 (br. s, 4H, CH(CH<sub>3</sub>)<sub>2</sub>), 1.99 (s, 36H, N(C(CH<sub>3</sub>)<sub>3</sub>)), 1.72 (s, 18H, C(CH<sub>3</sub>)<sub>3</sub>), 1.49 (s, 12H, CCH<sub>3</sub>), 1.05 ppm (s, 24H, CH(CH<sub>3</sub>)<sub>2</sub>). <sup>13</sup>C{<sup>1</sup>H} NMR (150.90 MHz, C<sub>6</sub>D<sub>6</sub>, 298 K) δ = 188.4, 141.9, 120.1, 119.3, 111.8, 58.4, 48.4, 36.2, 35.8, 33.0, 21.4, 9.8 ppm.

**NMR Spectra:  $^1\text{H}$  and  $^{13}\text{C}$  NMR Spectra**

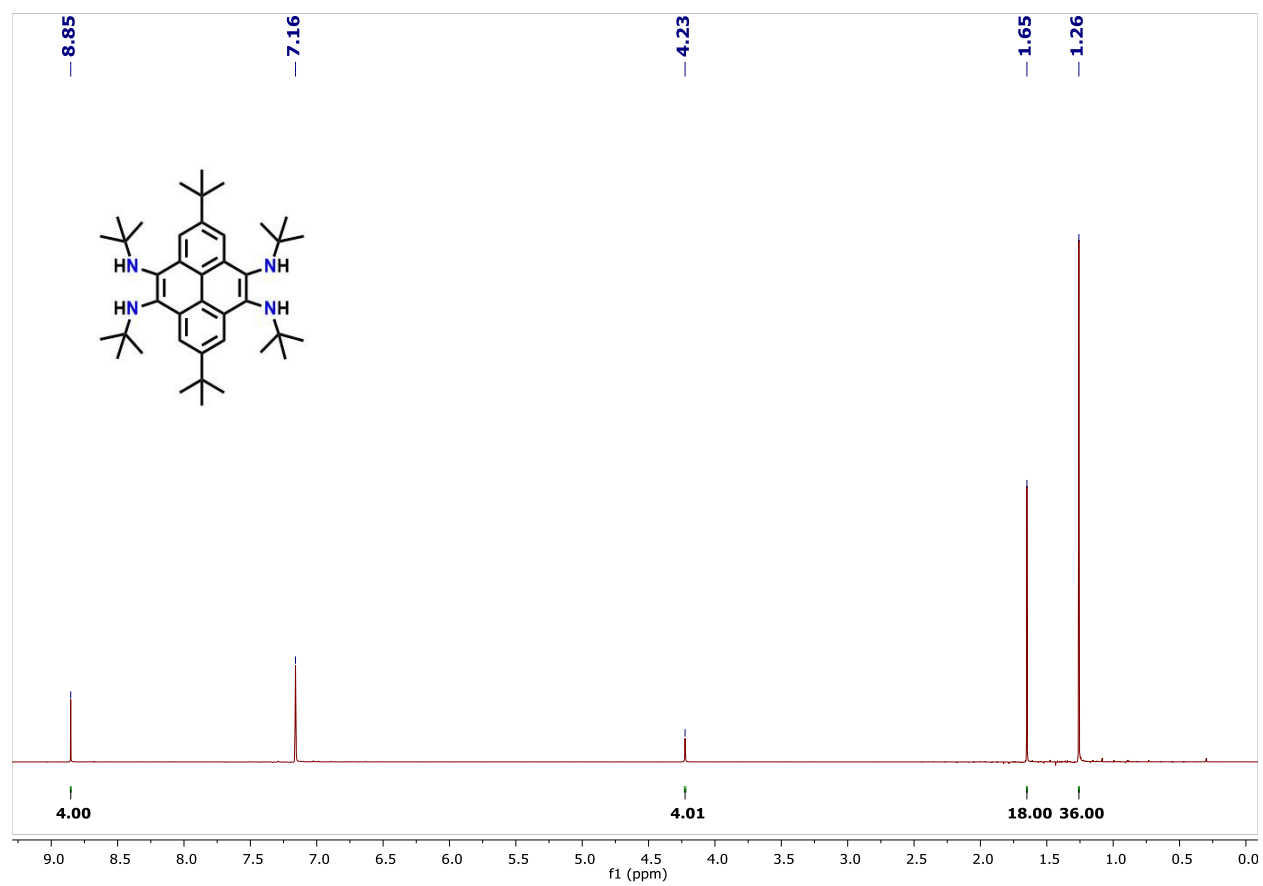

**Figure S1.**  $^1\text{H}$  NMR spectrum (600 MHz,  $\text{C}_6\text{D}_6$ , 298 K) of **1**.

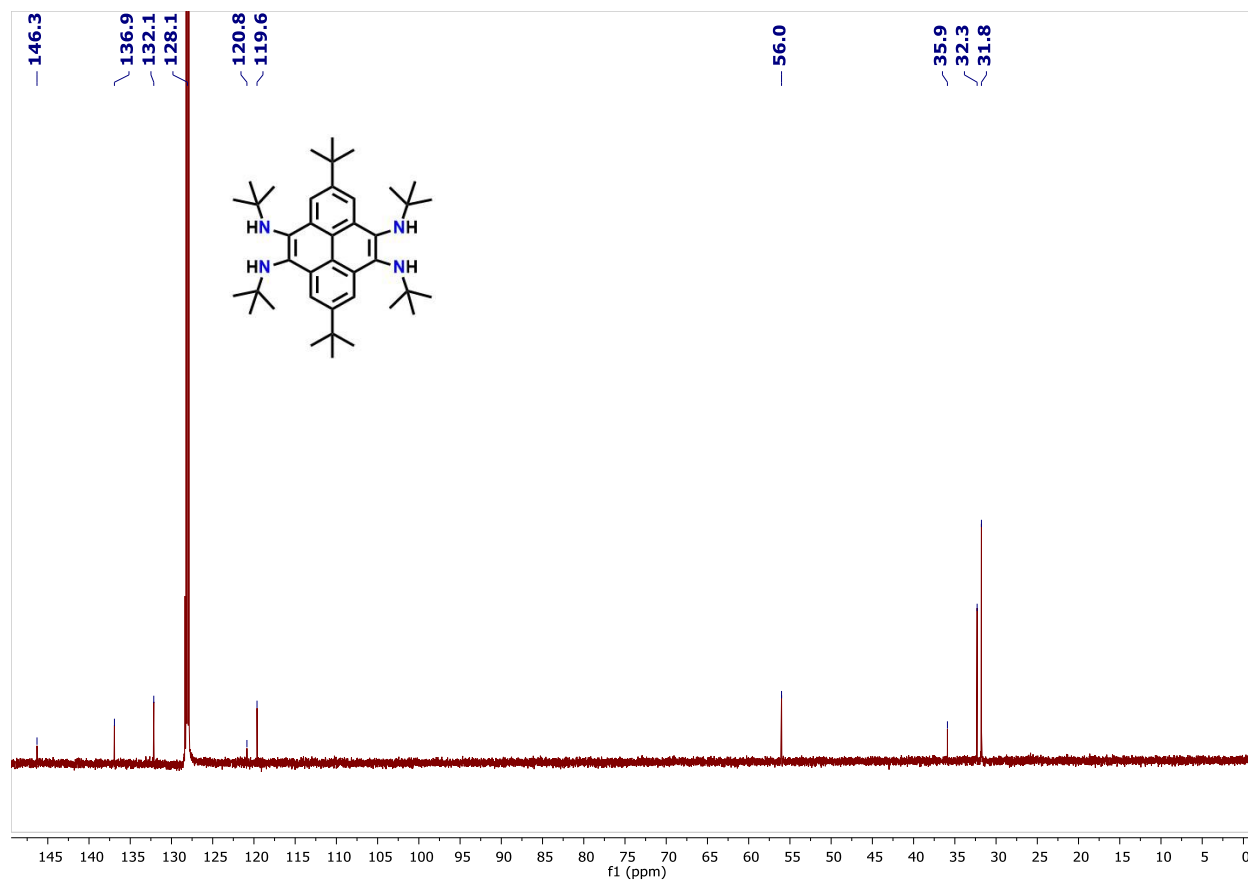

**Figure S2.**  $^{13}\text{C}$  NMR spectrum (151 MHz,  $\text{C}_6\text{D}_6$ , 298 K) of **1**.

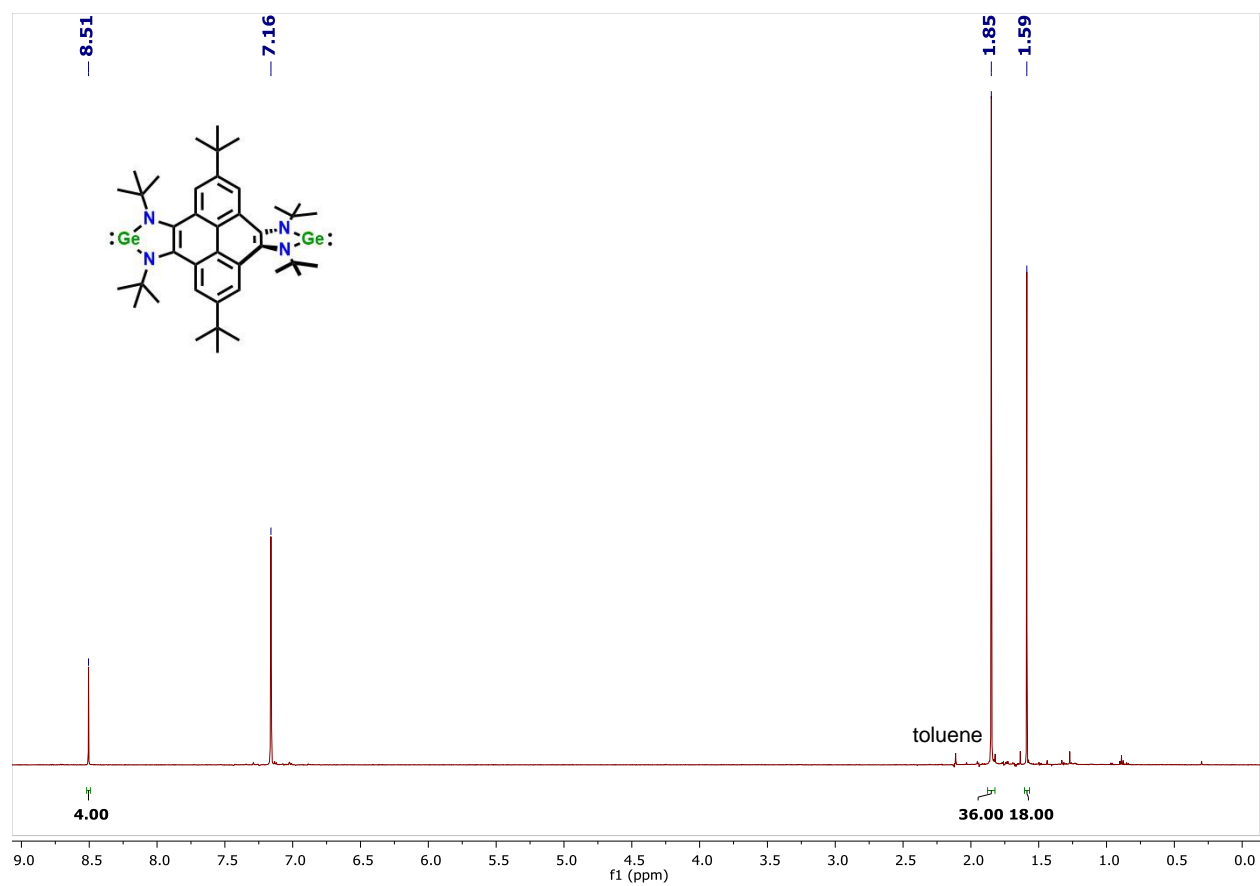

**Figure S3.**  $^1\text{H}$  NMR spectrum (600 MHz,  $\text{C}_6\text{D}_6$ , 298 K) of **2**.

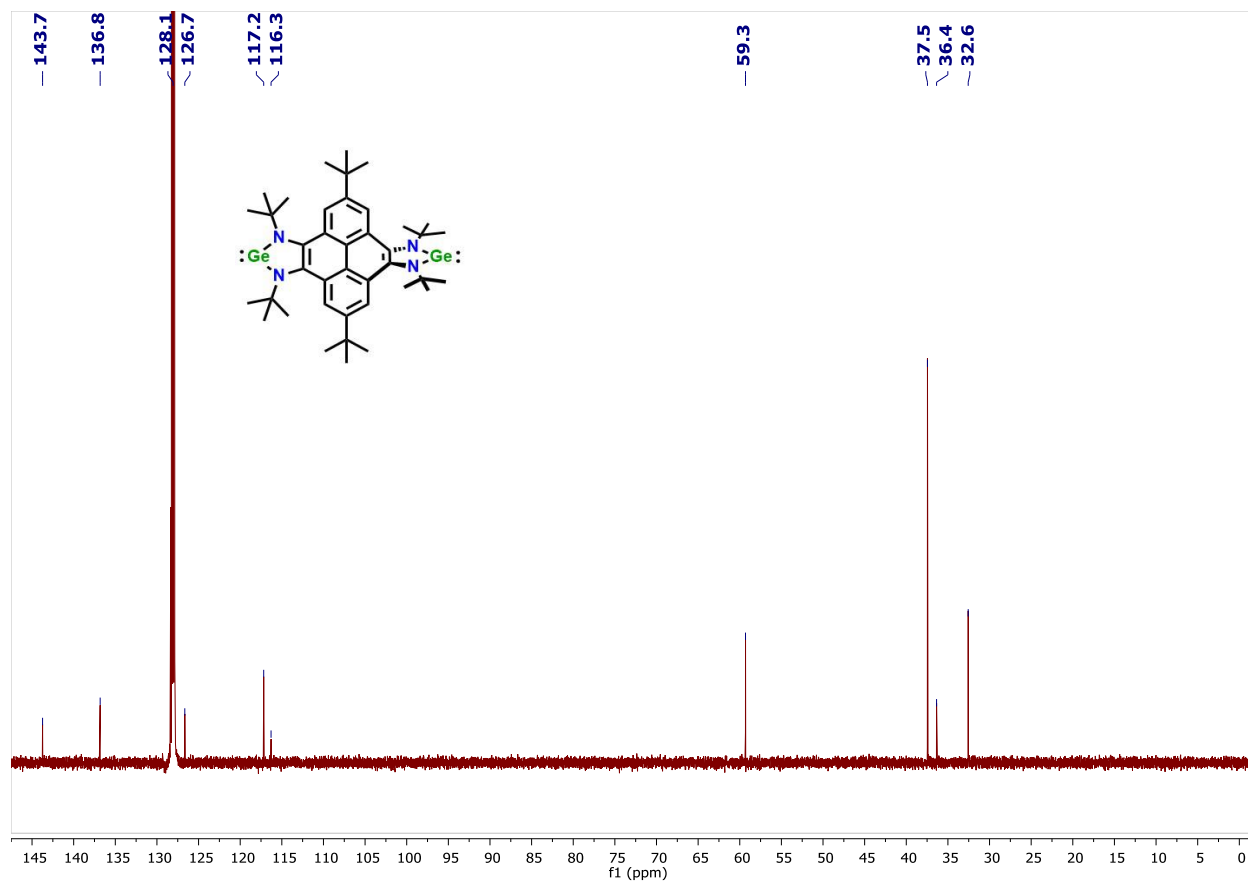

**Figure S4.**  $^{13}\text{C}$  NMR spectrum (151 MHz,  $\text{C}_6\text{D}_6$ , 298 K) of **2**.

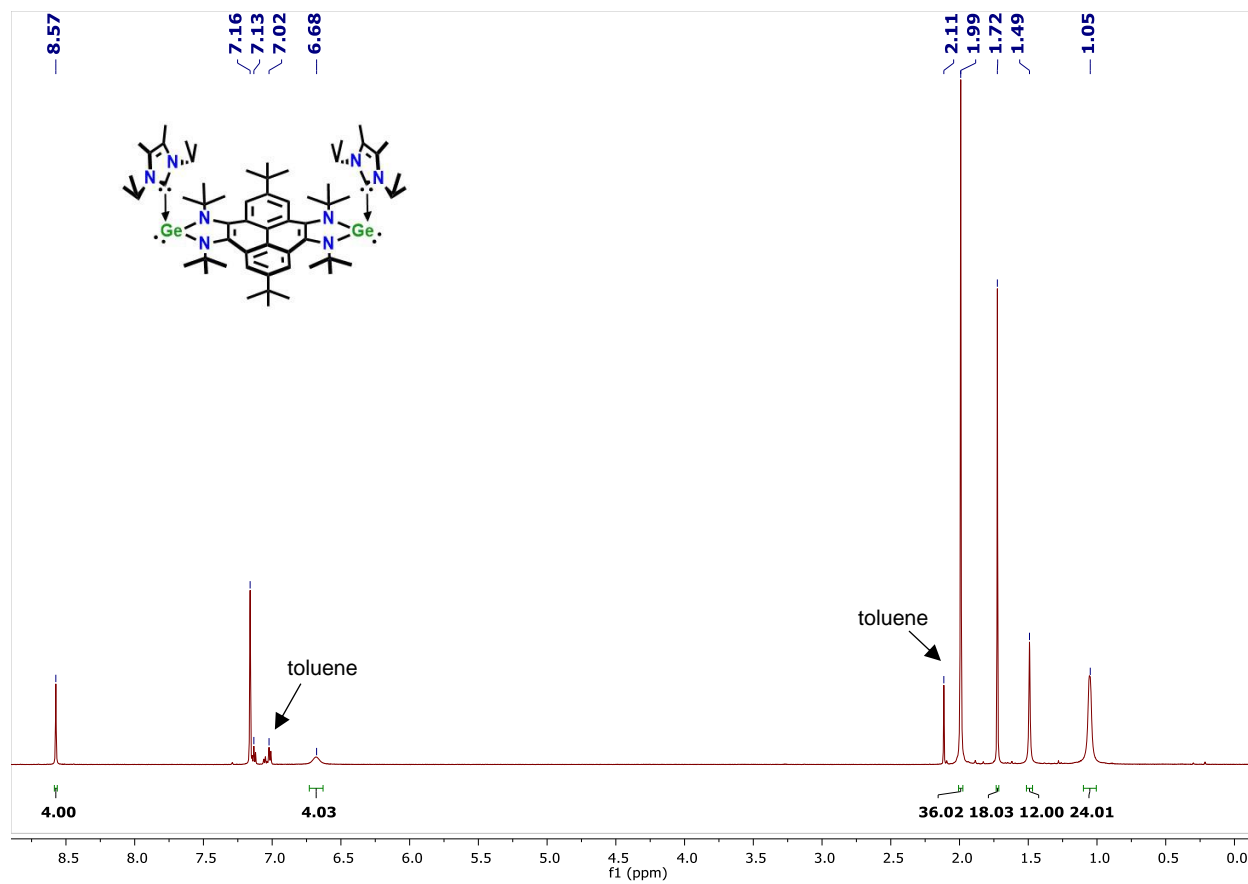

**Figure S5.** <sup>1</sup>H NMR spectrum (600 MHz, C<sub>6</sub>D<sub>6</sub>, 298 K) of **3**.



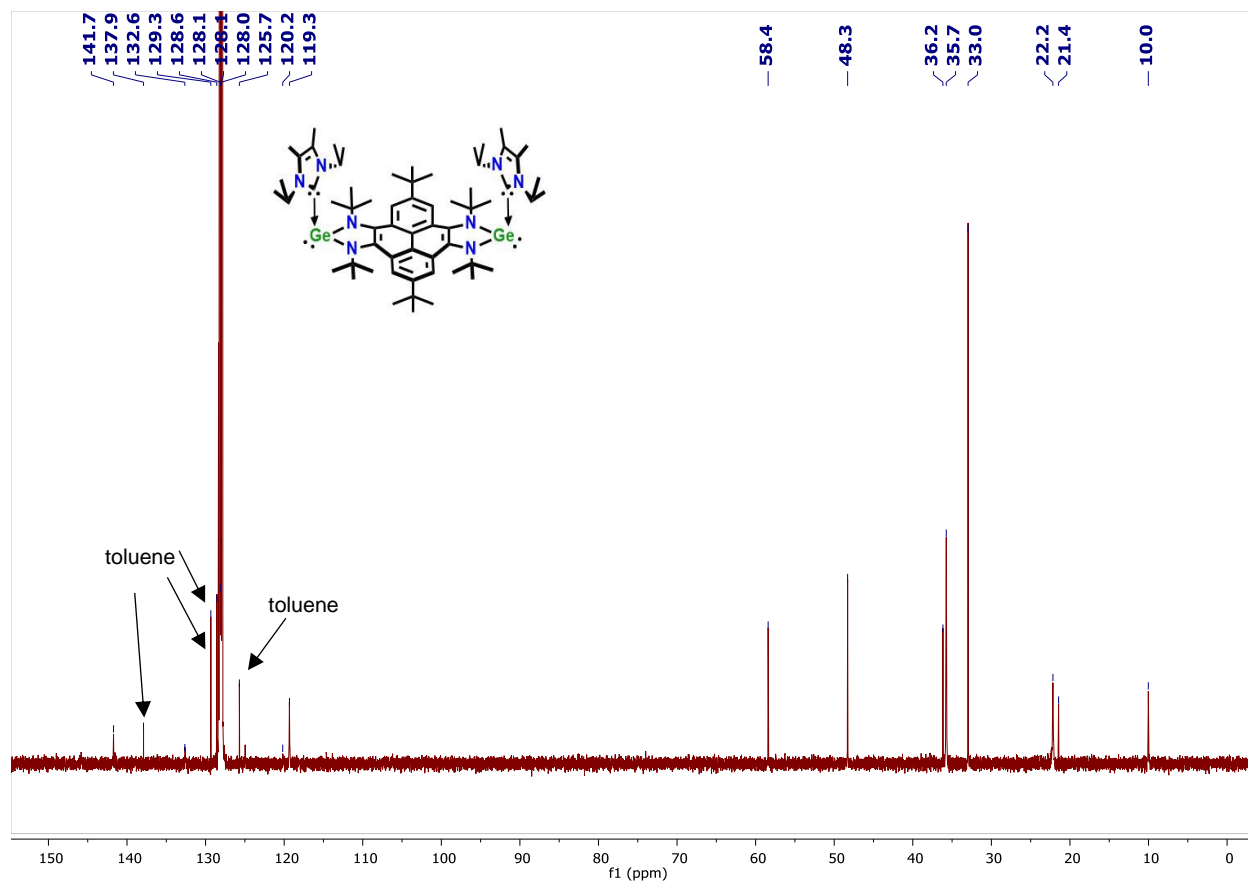

**Figure S6.** <sup>13</sup>C NMR spectrum (151 MHz, C<sub>6</sub>D<sub>6</sub>, 298 K) of **3**.

IR Spectra

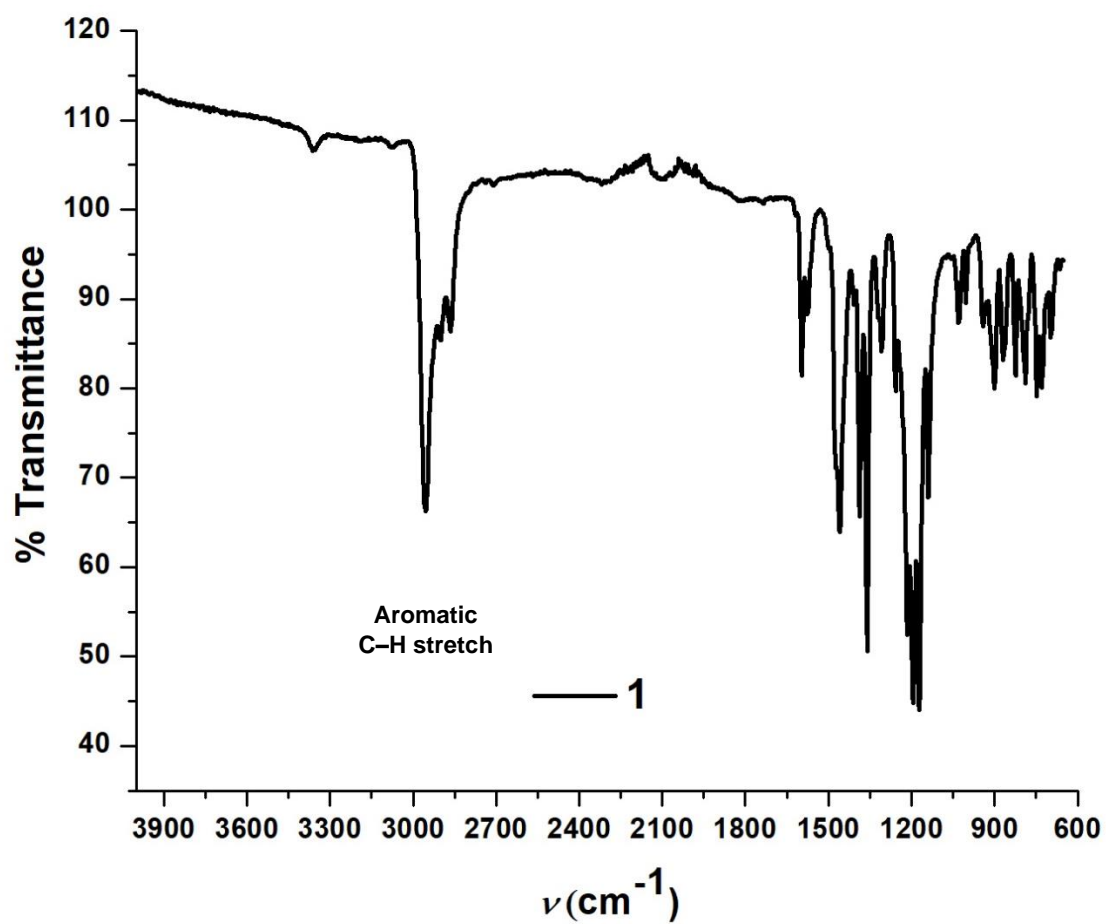

Figure S7. IR spectrum of compound 1.

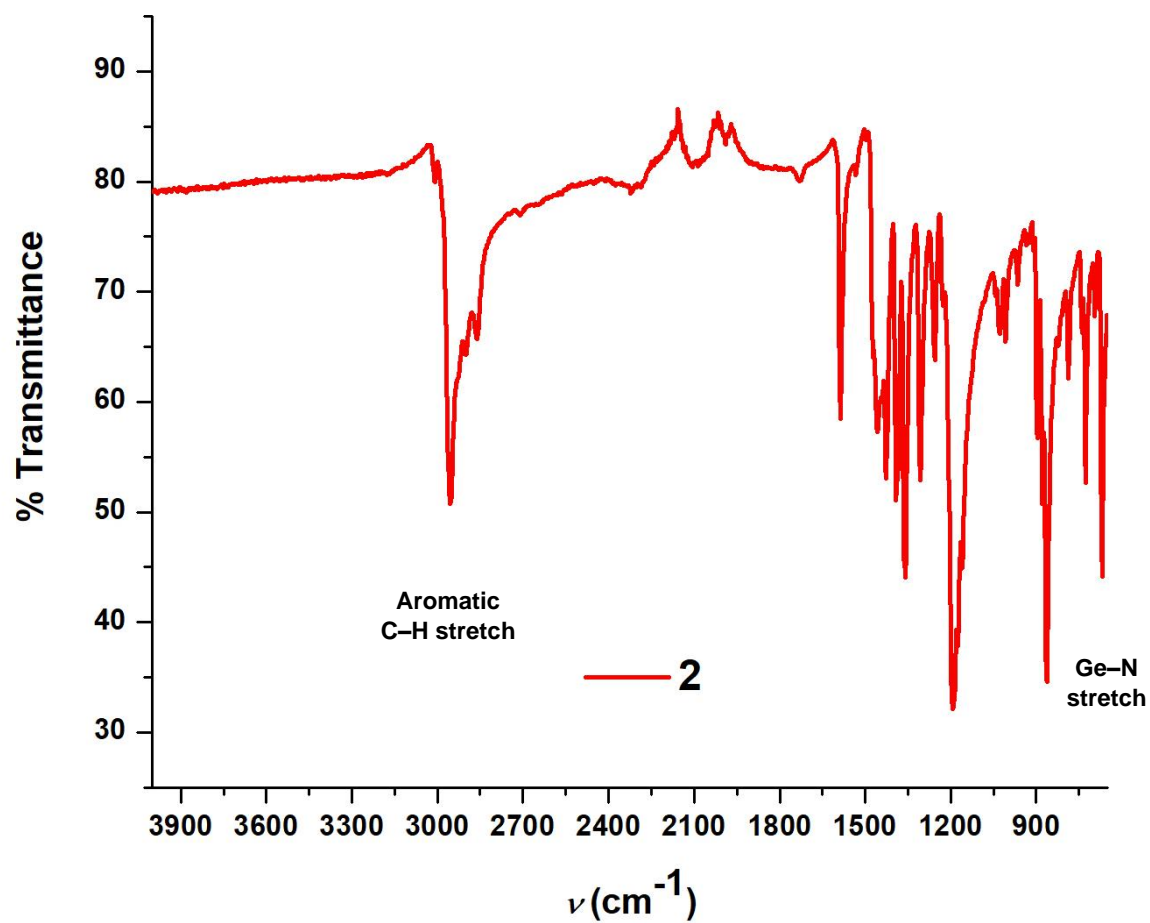

Figure S8. IR spectrum of compound 2.

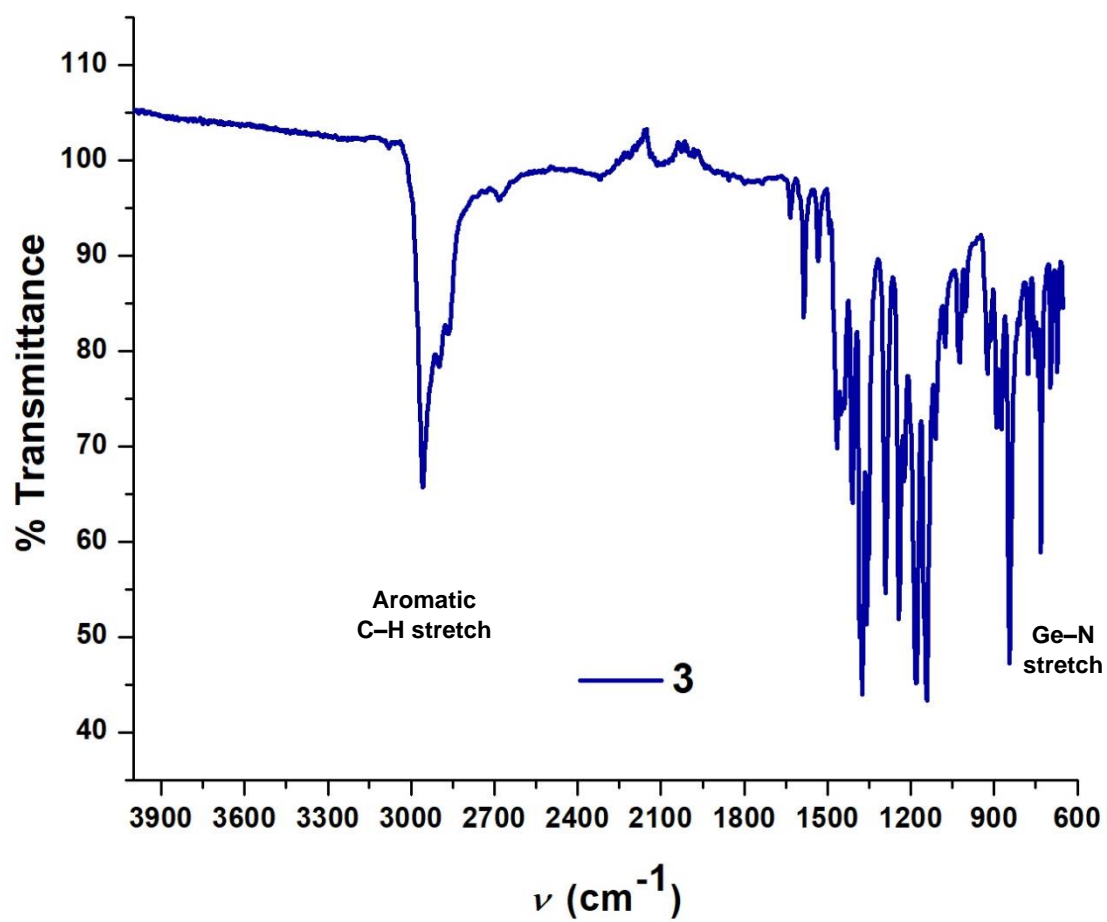

Figure S9. IR spectrum of compound 3.

## X-ray Crystallographic Data

Single crystals of **1**, **2**, or **3** were coated with Paratone oil and mounted on a MiTeGen MicroLoop. The X-ray intensity data were measured on a Bruker Kappa APEXII Duo diffractometer. Compound **1** was measured using an Incoatec Microfocus I $\mu$ S (Cu K $\alpha$ ,  $\lambda$  = 1.54178 Å) and a multilayer mirror monochromator, and **2**, **3**, and **S4** used a fine-focus sealed tube (Mo K $\alpha$ ,  $\lambda$  = 0.71073 Å) and a graphite monochromator. The frames were integrated with the Bruker SAINT software package<sup>4</sup> using a narrow-frame algorithm. Data were corrected for absorption effects using the Multi-Scan method (SADABS).<sup>4</sup> The structures were solved and refined using the Bruker SHELXTL Software Package<sup>5</sup> within APEX3<sup>4</sup> and OLEX2.<sup>6</sup> Non-hydrogen atoms were refined anisotropically. The N-H hydrogen atoms in **1** were located in the diffraction map and refined isotropically. All other hydrogen atoms were placed in geometrically calculated positions with  $U_{iso} = 1.2U_{equiv}$  of the parent atom ( $U_{iso} = 1.5U_{equiv}$  for methyl). For **1**, two of *tert*-butyl groups and one N-H group were disordered over two positions, and one *tert*-butyl group was disordered over four positions. The relative occupancies of each disordered site were freely refined, and constraints were used on the anisotropic displacement parameters of the four-fold disordered *tert*-butyl. The symmetry disordered toluene solvent molecule was modeled at 50% occupancy. For **2**, two toluene solvent molecules that co-crystallized with the complex were well-behaved, but a third one was severely disordered and could not be successfully modeled with or without restraints. Thus, the structure factors were modified using the PLATON SQUEEZE<sup>7</sup> technique, in order to produce a “solvate-free” structure factor set. PLATON reported a total electron density of 53 e<sup>-</sup> and total solvent accessible volume of 315 Å<sup>3</sup>.<sup>6</sup> One *tert*-butyl group was found to be disordered over two positions. The relative occupancies were freely refined, and no constraints or restraints were used on the disordered atoms. For **3**, one benzene solvent molecule was disordered over two positions. The relative occupancy of the two positions was freely refined, and no constraints or restraints were needed on the disordered atoms. For the **S4**, the relative occupancy of each pair of disordered atoms was freely refined, with constraints on the anisotropic displacement parameters of all disordered atoms, and restraints on the bond lengths of minor *tert*-butyl components. Several molecules of severely disordered THF were present in the crystal but they could not be adequately modeled with or without restraints. Thus, the structure factors were modified using the PLATON SQUEEZE<sup>7</sup> technique, in order to produce a “solvate-free” structure factor set. PLATON reported a total electron density of 603 e<sup>-</sup> and total solvent accessible volume of 1989 Å<sup>3</sup>.

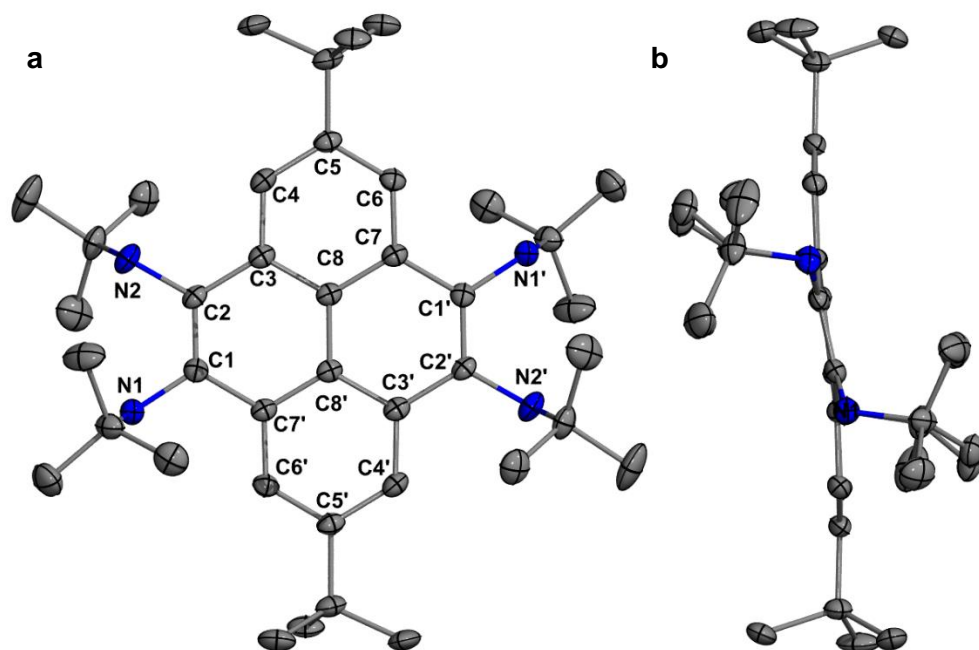

**Figure S10.** Crystal Structure of **1**. a) front view with atom labels, and b) side view displaying no twist angles. Thermal ellipsoids shown at 50% probability and H atoms were omitted for clarity. Twist angles ( $^{\circ}$ ): C2-C1-C2'-C1': 0; N2-N1-N2'-N1': 0.

**Table S1.** Crystal data for compounds **1-3** and **S4**.

|                                          | <b>1</b>                                        | <b>2</b>                                                       | <b>3</b>                                                        | <b>S4</b>                                                                              |
|------------------------------------------|-------------------------------------------------|----------------------------------------------------------------|-----------------------------------------------------------------|----------------------------------------------------------------------------------------|
| <b>Chemical formula</b>                  | C <sub>87</sub> H <sub>132</sub> N <sub>8</sub> | C <sub>54</sub> H <sub>74</sub> Ge <sub>2</sub> N <sub>4</sub> | C <sub>86</sub> H <sub>122</sub> Ge <sub>2</sub> N <sub>8</sub> | C <sub>42.74</sub> H <sub>66.23</sub> Ge <sub>2</sub> I <sub>1.26</sub> N <sub>4</sub> |
| <b>FW (g/mol)</b>                        | 1290.00                                         | 924.35                                                         | 1413.09                                                         | 940.89                                                                                 |
| <b>Temperature (K)</b>                   | 100(2)                                          | 100(2)                                                         | 100(2)                                                          | 100(2)                                                                                 |
| <b>Wavelength (Å)</b>                    | 1.54178                                         | 0.71073                                                        | 0.71073                                                         | 0.71073                                                                                |
| <b>Crystal size (mm)</b>                 | 0.131 x 0.132 x 0.148                           | 0.074 x 0.102 x 0.228                                          | 0.161 x 0.167 x 0.214                                           | 0.294 x 0.314 x 0.438                                                                  |
| <b>Crystal habit</b>                     | colorless block                                 | yellow rod                                                     | yellow block                                                    | yellow block                                                                           |
| <b>Crystal system</b>                    | triclinic                                       | triclinic                                                      | monoclinic                                                      | orthorhombic                                                                           |
| <b>Space group</b>                       | P -1                                            | P -1                                                           | C 2/c                                                           | P n m a                                                                                |
| <b>a (Å)</b>                             | 11.1927(4)                                      | 11.7824(12)                                                    | 16.5571(11)                                                     | 19.7850(18)                                                                            |
| <b>b (Å)</b>                             | 13.6662(6)                                      | 13.8010(13)                                                    | 17.5990(13)                                                     | 17.7220(17)                                                                            |
| <b>c (Å)</b>                             | 13.8032(5)                                      | 16.8291(16)                                                    | 27.336(2)                                                       | 17.0451(16)                                                                            |
| <b>α (°)</b>                             | 108.458(2)                                      | 80.933(3)                                                      | 90                                                              | 90                                                                                     |
| <b>β (°)</b>                             | 94.156(3)                                       | 77.324(3)                                                      | 99.608(2)                                                       | 90                                                                                     |
| <b>γ (°)</b>                             | 96.504(2)                                       | 89.214(3)                                                      | 90                                                              | 90                                                                                     |
| <b>Volume (Å<sup>3</sup>)</b>            | 1976.66(14)                                     | 2635.9(4)                                                      | 7853.7(10)                                                      | 5976.5(10)                                                                             |
| <b>Z</b>                                 | 1                                               | 2                                                              | 4                                                               | 4                                                                                      |
| <b>Calcd. Density (g/cm<sup>3</sup>)</b> | 1.084                                           | 1.165                                                          | 1.195                                                           | 1.046                                                                                  |
| <b>μ (mm<sup>-1</sup>)</b>               | 0.470                                           | 1.176                                                          | 0.814                                                           |                                                                                        |
| <b>Theta range</b>                       | 3.40 to 68.34                                   | 1.26 to 25.71                                                  | 1.70 to 28.32                                                   | 1.58 to 25.40                                                                          |
| <b>Index ranges</b>                      | -12 ≤ h ≤ 13<br>-16 ≤ k ≤ 16<br>-16 ≤ l ≤ 16    | -12 ≤ h ≤ 14<br>-16 ≤ k ≤ 16<br>-20 ≤ l ≤ 20                   | -22 ≤ h ≤ 21<br>-23 ≤ k ≤ 23<br>-34 ≤ l ≤ 36                    | -23 ≤ h ≤ 23<br>-20 ≤ k ≤ 21<br>-20 ≤ l ≤ 20                                           |
| <b>Reflections collected</b>             | 28562                                           | 42614                                                          | 47450                                                           | 47710                                                                                  |
| <b>Independent reflections</b>           | 7244 [R <sub>int</sub> = 0.0530]                | 10041 [R <sub>int</sub> = 0.0828]                              | 9759 [R <sub>int</sub> = 0.0578]                                | 5677 [R <sub>int</sub> = 0.0517]                                                       |
| <b>Data / restraints / parameters</b>    | 7244 / 1 / 589                                  | 10041 / 0 / 592                                                | 9759 / 0 / 477                                                  | 5677 / 6 / 2252                                                                        |
| <b>Goodness-of-fit on F<sup>2</sup></b>  | 1.043                                           | 1.019                                                          | 1.008                                                           | 1.052                                                                                  |
| <b>R1 I&gt;2σ(I)</b>                     | 0.0463                                          | 0.0468                                                         | 0.0365                                                          | 0.1012                                                                                 |
| <b>wR2 (all data)</b>                    | 0.1261                                          | 0.1143                                                         | 0.0804                                                          | 0.2220                                                                                 |
| <b>CCDC number</b>                       | 1946973                                         | 1946974                                                        | 1946975                                                         | 1962780                                                                                |

## Reaction of **2** with Methyl Iodide

To address a reviewer comment regarding whether or not the twisting of compound **2** was due to a steric or electronic effect, we reacted **2** with MeI to obtain a compound containing two Ge(IV) centers. After heating a mixture of **2** and MeI to 50 °C in THF for 16 hrs the solvent was removed. Proton NMR of the solid indicated a complex mixture containing several products. Single crystals from six different batches were grown from a concentrated THF solution at -37 °C. In each case the structure distinctly revealed Ge(IV) centers with different ratios of Me and I (Figure S11). In all cases the structures contain a bent pyrene core and therefore we attribute the extremely twisted structure of **2** to be due to the steric interaction of the *N*-(*tert*-butyl) groups and the pyrene-H.

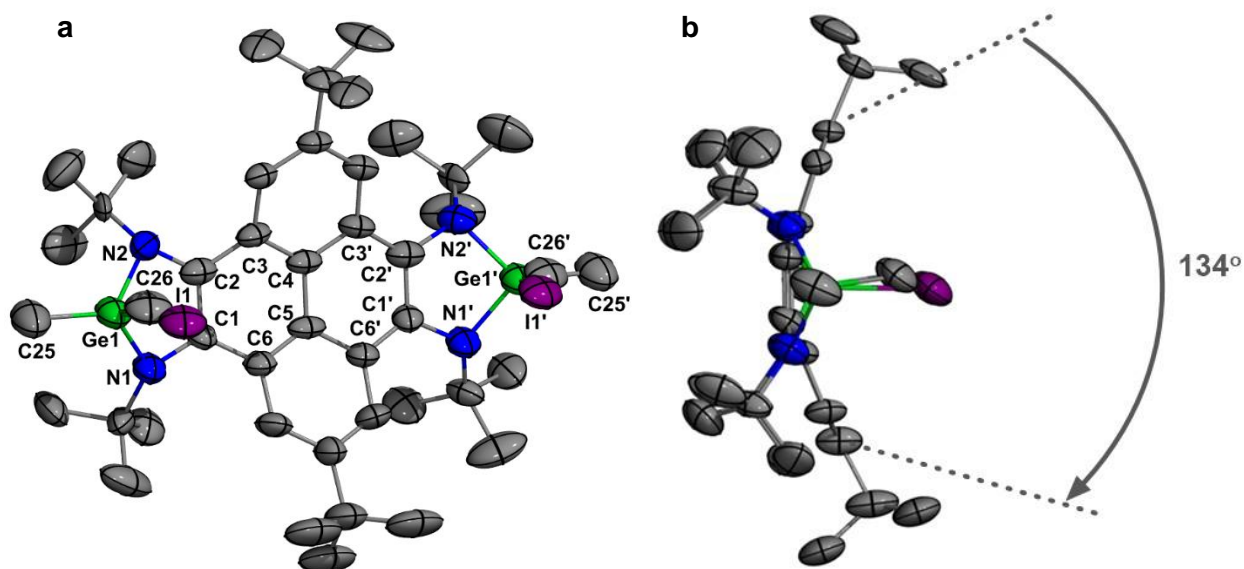

**Figure S11.** Crystal Structure of **S4**. a) Front view with atom labels, and b) side view displaying bend angle. Thermal ellipsoids shown at 50% probability and H atoms were omitted for clarity. The structure is a mixture of methyl iodide to dimethyl where the occupancy of the I atom is 60%, and the remaining 40% corresponds to Me. Bend angle (°): 134. The bend angle refers to the angle between the torsion planes containing the C7-C8-C7', and C9-C10-C9' atoms.



## Theoretical Calculations

The starting geometries of compounds **2** and **3** were extracted from the X-ray crystal structures. Hydrogen positions were optimized using the Universal Force Field (UFF) freezing the location of all other atoms. The geometry of structure of **1** was generated from the molecular geometry of compound **2** from the X-ray crystal structure (the valency of the four amine nitrogens were satisfied with hydrogen atoms) and subsequently optimizing the structure at the B3LYP/BS1 level of theory. The DFT-optimized geometry of compound **2** (structure **2<sup>a</sup>**, the lowest energy conformer) compares quite favorably with molecular geometry from the X-ray crystal structure. All subsequent electronic structure theory computations were carried out as single-point computations on these geometries. All computations were carried out using Gaussian 16 Revision B.01.<sup>8</sup> The basis sets used were BS1 (BS1 = 6-31G(d')) basis set<sup>9-11</sup> for C, H, and N; LANL2DZ(d,p) with LANL2DZ ECP for Ge)<sup>12,13</sup> and BS2 (BS2 = 6-311+G\*\* basis sets<sup>14,15</sup> for C, H, and N; 6-311G\*\* basis set<sup>16</sup> for Ge). Nucleus-Independent Chemical Shift (NICS) values<sup>17</sup> were computed for each aromatic ring of the compounds by computing gas phase magnetic shielding tensors of ghost atoms placed at the centroid of each ring [NICS(0)] using the Gauge Independent Atomic Orbital (GIAO)<sup>18-21</sup> method at the B3LYP/BS2 level of theory.<sup>22,23</sup> To simulate the absorption spectra, the first twenty vertical transitions were computed with B3LYP/BS1 using time dependent density functional theory (TD-DFT).<sup>24</sup> Simulated absorption spectra were obtained using an in-house Fortran program by convoluting the computed excitation energies and oscillator strengths with a Gaussian line-shape and a broadening of 20 nm. Orbital pictures were generated using Chemcraft with a contour value of 0.05. Structural comparisons and overlay figures were generated with JIMP2.<sup>25-27</sup>

## Frontier Molecular Orbitals

MO 166                      LUMO                       $-0.03729$  Ha

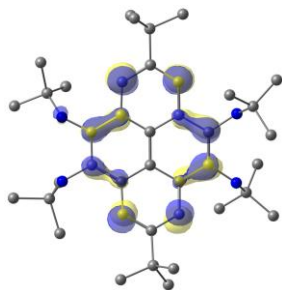

MO 165                      HOMO                       $-0.16233$  Ha

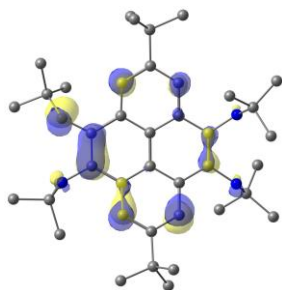

**Figure S12.** Selected frontier molecular orbitals for the DFT-optimized geometry of compound **1** and their energies in Hartrees (Ha).

MO 168                      LUMO                       $-0.03933 \text{ Ha}$

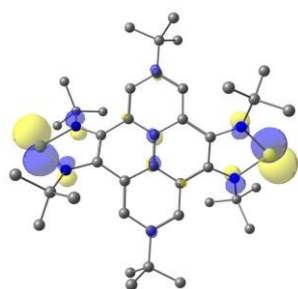

MO 167                      HOMO                       $-0.15373 \text{ Ha}$

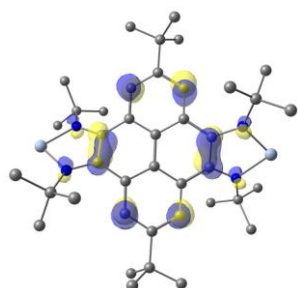

MO 163                      HOMO – 4                       $-0.23229 \text{ Ha}$

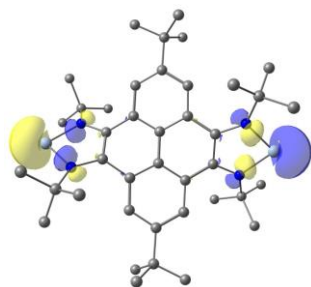

MO 162                      HOMO – 5                       $-0.23563 \text{ Ha}$

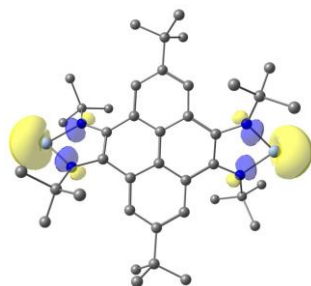

**Figure S13.** Selected frontier molecular orbitals for the DFT-optimized geometry of compound **2<sup>a</sup>** and their energies in Hartrees (Ha).

MO 268                      LUMO                      -0.01988 Ha

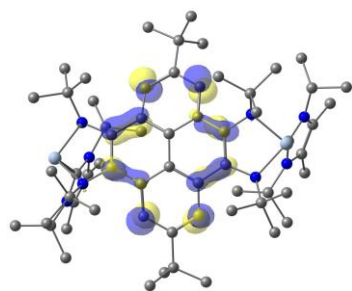

MO 267                      HOMO                      -0.13473 Ha

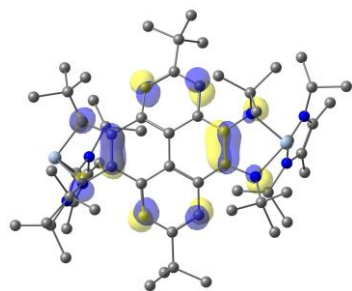

MO 265                      HOMO - 2                      -0.16555 Ha

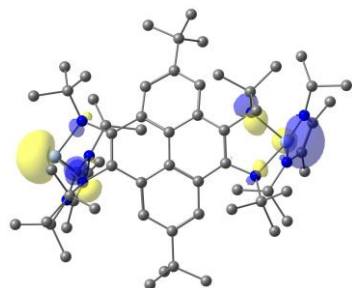

MO 264                      HOMO - 3                      -0.16776 Ha

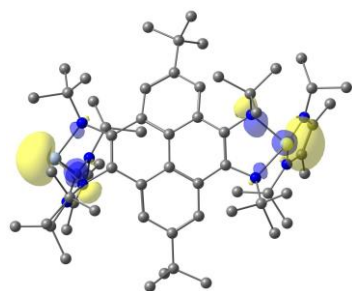

**Figure S14.** Selected frontier molecular orbitals for the DFT-optimized geometry of compound **3<sup>a</sup>** and their energies in Hartrees (Ha).

### Simulated UV-vis Spectra

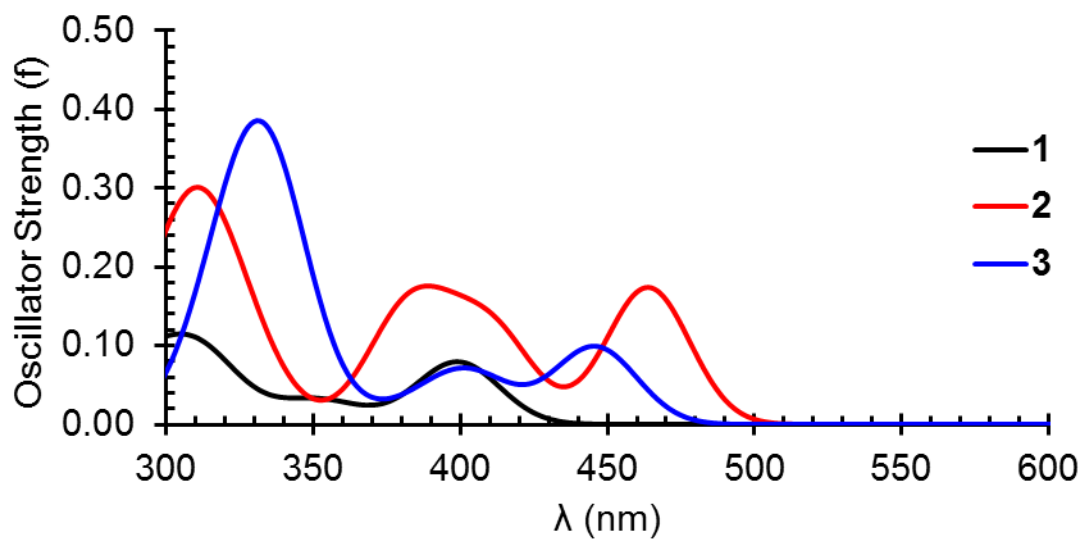

**Figure S15.** Simulated UV-vis absorption spectra of **1-3**. The above spectrum shows simulated UV-vis for **1**, **2<sup>a</sup>**, and **3<sup>a</sup>**. The  $\lambda_{\text{max}}$  of **1** is very similar in wavelength to the shoulder peak of **3** (399 nm and 404 nm, respectively). The  $\lambda_{\text{max}}$  of **2<sup>a</sup>** is more red shifted than the  $\lambda_{\text{max}}$  of both **1** and **3<sup>a</sup>**.

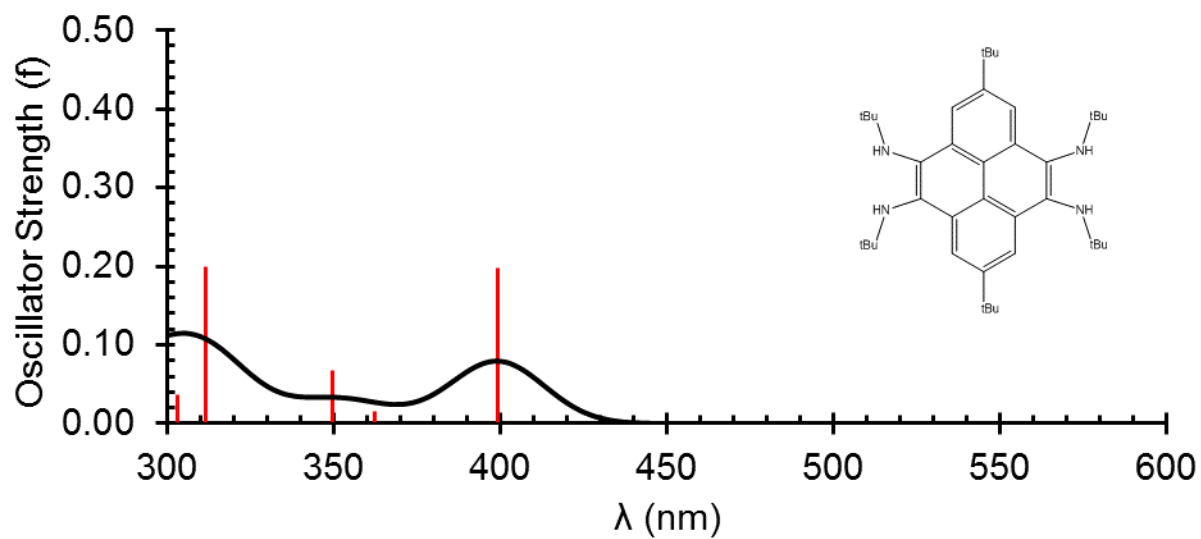

**Figure S16.** Simulated UV-vis absorption spectrum from TDDFT excitations for compound **1**.

**Table S2.** Electronic transitions for the calculated transitions of **1** and their orbital contributions.

| $\lambda$ (nm) | Character               | % NTO Contribution |
|----------------|-------------------------|--------------------|
| 399            | $\pi \rightarrow \pi^*$ | 96%                |
| 350            | $\pi \rightarrow \pi^*$ | 90%                |
| 312            | $\pi \rightarrow \pi^*$ | 59%                |
|                | $\pi \rightarrow \pi^*$ | 37%                |

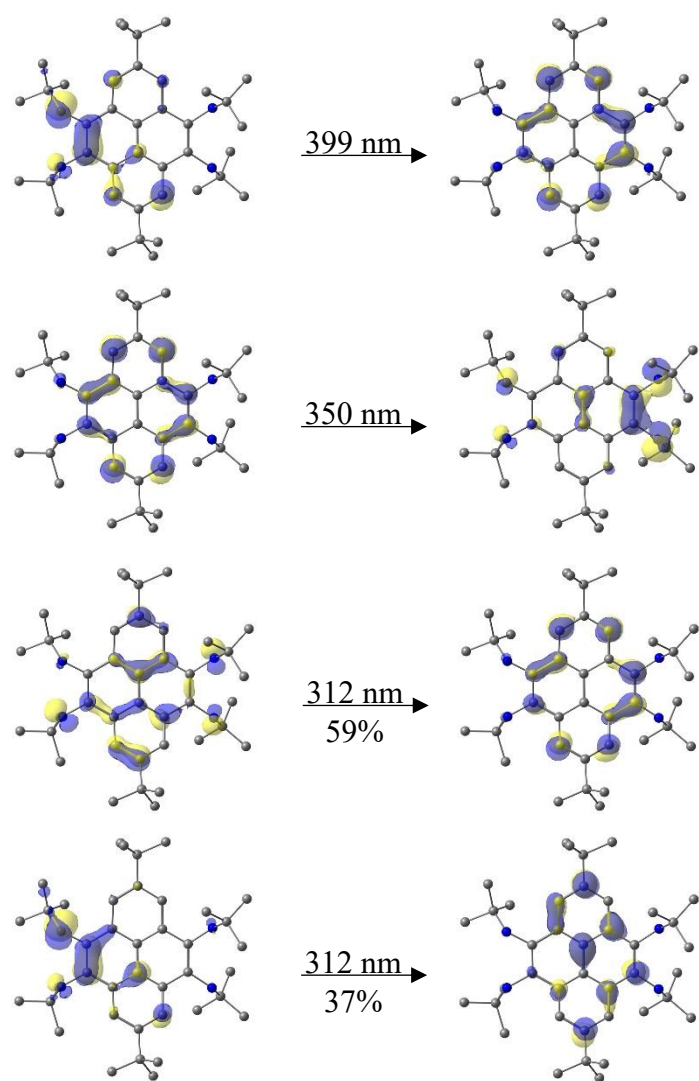

**Figure S17.** Natural Transition Orbitals (NTO) for the calculated transitions of **1**.

## Output for TDDFT excitations for compound 1

HOMO is 165

ES with  $f > 0.01$

|                   |           |        |    |        |    |        |              |
|-------------------|-----------|--------|----|--------|----|--------|--------------|
| Excited State 1:  | Singlet-A | 3.1058 | ev | 399.21 | nm | 0.1968 | <S**2>=0.000 |
| Excited State 2:  | Singlet-A | 3.4204 | ev | 362.49 | nm | 0.0148 | <S**2>=0.000 |
| Excited State 3:  | Singlet-A | 3.5437 | ev | 349.88 | nm | 0.0677 | <S**2>=0.000 |
| Excited State 4:  | Singlet-A | 3.9802 | ev | 311.50 | nm | 0.1996 | <S**2>=0.000 |
| Excited State 5:  | Singlet-A | 4.0915 | ev | 303.03 | nm | 0.0361 | <S**2>=0.000 |
| Excited State 6:  | Singlet-A | 4.2730 | ev | 290.16 | nm | 0.1047 | <S**2>=0.000 |
| Excited State 8:  | Singlet-A | 4.4183 | ev | 280.62 | nm | 0.0163 | <S**2>=0.000 |
| Excited State 9:  | Singlet-A | 4.6835 | ev | 264.72 | nm | 0.0474 | <S**2>=0.000 |
| Excited State 10: | Singlet-A | 4.6921 | ev | 264.24 | nm | 0.0373 | <S**2>=0.000 |
| Excited State 11: | Singlet-A | 4.7965 | ev | 258.49 | nm | 0.0712 | <S**2>=0.000 |
| Excited State 12: | Singlet-A | 5.0209 | ev | 246.94 | nm | 0.4341 | <S**2>=0.000 |
| Excited State 14: | Singlet-A | 5.1493 | ev | 240.78 | nm | 0.1031 | <S**2>=0.000 |
| Excited State 15: | Singlet-A | 5.1907 | ev | 238.86 | nm | 0.1105 | <S**2>=0.000 |
| Excited State 16: | Singlet-A | 5.2168 | ev | 237.66 | nm | 0.0400 | <S**2>=0.000 |
| Excited State 17: | Singlet-A | 5.3219 | ev | 232.97 | nm | 0.2195 | <S**2>=0.000 |
| Excited State 18: | Singlet-A | 5.3564 | ev | 231.47 | nm | 0.0196 | <S**2>=0.000 |
| Excited State 19: | Singlet-A | 5.4745 | ev | 226.47 | nm | 0.2745 | <S**2>=0.000 |
|                   |           |        |    |        |    |        |              |
| Excited State 1:  | Singlet-A | 3.1058 | ev | 399.21 | nm | 0.1968 | <S**2>=0.000 |
| 163 ->167         | 0.10976   |        |    |        |    |        |              |
| 164 ->166         | 0.18117   |        |    |        |    |        |              |
| 165 ->166         | 0.66529   |        |    |        |    |        |              |
|                   |           |        |    |        |    |        |              |
| Excited State 2:  | Singlet-A | 3.4204 | ev | 362.49 | nm | 0.0148 | <S**2>=0.000 |
| 163 ->166         | -0.31092  |        |    |        |    |        |              |
| 164 ->166         | 0.26769   |        |    |        |    |        |              |
| 165 ->167         | 0.56513   |        |    |        |    |        |              |
|                   |           |        |    |        |    |        |              |
| Excited State 3:  | Singlet-A | 3.5437 | ev | 349.88 | nm | 0.0677 | <S**2>=0.000 |
| 163 ->166         | 0.21797   |        |    |        |    |        |              |
| 164 ->166         | 0.61442   |        |    |        |    |        |              |
| 165 ->166         | -0.13819  |        |    |        |    |        |              |
| 165 ->167         | -0.19637  |        |    |        |    |        |              |
|                   |           |        |    |        |    |        |              |
| Excited State 4:  | Singlet-A | 3.9802 | ev | 311.50 | nm | 0.1996 | <S**2>=0.000 |
| 161 ->166         | 0.12628   |        |    |        |    |        |              |
| 163 ->166         | 0.51186   |        |    |        |    |        |              |
| 164 ->167         | 0.24665   |        |    |        |    |        |              |
| 165 ->167         | 0.32611   |        |    |        |    |        |              |
| 165 ->168         | -0.15490  |        |    |        |    |        |              |
|                   |           |        |    |        |    |        |              |
| Excited State 5:  | Singlet-A | 4.0915 | ev | 303.03 | nm | 0.0361 | <S**2>=0.000 |
| 163 ->166         | 0.10538   |        |    |        |    |        |              |
| 165 ->168         | 0.67430   |        |    |        |    |        |              |
|                   |           |        |    |        |    |        |              |
| Excited State 6:  | Singlet-A | 4.2730 | ev | 290.16 | nm | 0.1047 | <S**2>=0.000 |
| 160 ->166         | 0.10046   |        |    |        |    |        |              |
| 162 ->166         | -0.12630  |        |    |        |    |        |              |
| 163 ->166         | -0.21391  |        |    |        |    |        |              |
| 163 ->168         | 0.11001   |        |    |        |    |        |              |
| 164 ->167         | 0.61440   |        |    |        |    |        |              |
|                   |           |        |    |        |    |        |              |
| Excited State 8:  | Singlet-A | 4.4183 | ev | 280.62 | nm | 0.0163 | <S**2>=0.000 |
| 161 ->166         | 0.63521   |        |    |        |    |        |              |
| 163 ->167         | -0.13486  |        |    |        |    |        |              |
| 165 ->169         | -0.17218  |        |    |        |    |        |              |
|                   |           |        |    |        |    |        |              |
| Excited State 9:  | Singlet-A | 4.6835 | ev | 264.72 | nm | 0.0474 | <S**2>=0.000 |
| 160 ->166         | 0.43921   |        |    |        |    |        |              |
| 163 ->167         | -0.29525  |        |    |        |    |        |              |
| 165 ->169         | -0.39108  |        |    |        |    |        |              |
|                   |           |        |    |        |    |        |              |
| Excited State 10: | Singlet-A | 4.6921 | ev | 264.24 | nm | 0.0373 | <S**2>=0.000 |
| 159 ->166         | 0.16359   |        |    |        |    |        |              |
| 160 ->166         | 0.42049   |        |    |        |    |        |              |



|                   |           |           |           |        |              |  |
|-------------------|-----------|-----------|-----------|--------|--------------|--|
| 161 ->166         | 0.14810   |           |           |        |              |  |
| 163 ->167         | -0.13675  |           |           |        |              |  |
| 165 ->169         | 0.47233   |           |           |        |              |  |
| Excited State 11: | Singlet-A | 4.7965 eV | 258.49 nm | 0.0712 | <S**2>=0.000 |  |
| 160 ->166         | -0.25110  |           |           |        |              |  |
| 161 ->167         | -0.10452  |           |           |        |              |  |
| 163 ->167         | -0.38864  |           |           |        |              |  |
| 164 ->168         | 0.48384   |           |           |        |              |  |
| Excited State 12: | Singlet-A | 5.0209 eV | 246.94 nm | 0.4341 | <S**2>=0.000 |  |
| 160 ->166         | 0.10523   |           |           |        |              |  |
| 160 ->167         | -0.14007  |           |           |        |              |  |
| 161 ->166         | 0.12780   |           |           |        |              |  |
| 161 ->167         | 0.24031   |           |           |        |              |  |
| 163 ->167         | 0.34616   |           |           |        |              |  |
| 163 ->168         | -0.17960  |           |           |        |              |  |
| 164 ->168         | 0.44059   |           |           |        |              |  |
| Excited State 14: | Singlet-A | 5.1493 eV | 240.78 nm | 0.1031 | <S**2>=0.000 |  |
| 158 ->166         | 0.16162   |           |           |        |              |  |
| 159 ->166         | 0.39917   |           |           |        |              |  |
| 159 ->167         | -0.11303  |           |           |        |              |  |
| 160 ->166         | -0.10661  |           |           |        |              |  |
| 161 ->167         | 0.15928   |           |           |        |              |  |
| 162 ->167         | 0.22047   |           |           |        |              |  |
| 163 ->167         | -0.11130  |           |           |        |              |  |
| 163 ->168         | -0.35844  |           |           |        |              |  |
| 164 ->169         | -0.17832  |           |           |        |              |  |
| Excited State 15: | Singlet-A | 5.1907 eV | 238.86 nm | 0.1105 | <S**2>=0.000 |  |
| 159 ->166         | 0.26724   |           |           |        |              |  |
| 161 ->167         | 0.14115   |           |           |        |              |  |
| 162 ->167         | 0.24601   |           |           |        |              |  |
| 163 ->168         | 0.50698   |           |           |        |              |  |
| 164 ->168         | 0.10538   |           |           |        |              |  |
| 164 ->169         | -0.15318  |           |           |        |              |  |
| Excited State 16: | Singlet-A | 5.2168 eV | 237.66 nm | 0.0400 | <S**2>=0.000 |  |
| 158 ->166         | 0.16744   |           |           |        |              |  |
| 159 ->166         | 0.16213   |           |           |        |              |  |
| 161 ->167         | -0.39266  |           |           |        |              |  |
| 162 ->167         | 0.21079   |           |           |        |              |  |
| 164 ->169         | 0.44372   |           |           |        |              |  |
| Excited State 17: | Singlet-A | 5.3219 eV | 232.97 nm | 0.2195 | <S**2>=0.000 |  |
| 158 ->166         | 0.19924   |           |           |        |              |  |
| 159 ->166         | -0.25110  |           |           |        |              |  |
| 161 ->167         | 0.33648   |           |           |        |              |  |
| 162 ->167         | 0.15553   |           |           |        |              |  |
| 162 ->168         | -0.14050  |           |           |        |              |  |
| 163 ->167         | -0.13769  |           |           |        |              |  |
| 163 ->169         | -0.18458  |           |           |        |              |  |
| 164 ->169         | 0.27053   |           |           |        |              |  |
| 165 ->169         | 0.12876   |           |           |        |              |  |
| 165 ->170         | -0.13889  |           |           |        |              |  |
| 165 ->171         | -0.15128  |           |           |        |              |  |
| Excited State 18: | Singlet-A | 5.3564 eV | 231.47 nm | 0.0196 | <S**2>=0.000 |  |
| 158 ->166         | 0.12140   |           |           |        |              |  |
| 164 ->170         | -0.14663  |           |           |        |              |  |
| 165 ->170         | 0.65388   |           |           |        |              |  |
| Excited State 19: | Singlet-A | 5.4745 eV | 226.47 nm | 0.2745 | <S**2>=0.000 |  |
| 158 ->166         | 0.33708   |           |           |        |              |  |
| 159 ->166         | -0.18228  |           |           |        |              |  |
| 160 ->167         | 0.13266   |           |           |        |              |  |
| 161 ->167         | -0.26499  |           |           |        |              |  |
| 163 ->167         | 0.10321   |           |           |        |              |  |
| 163 ->169         | -0.15887  |           |           |        |              |  |
| 164 ->169         | -0.30850  |           |           |        |              |  |
| 165 ->171         | -0.22431  |           |           |        |              |  |

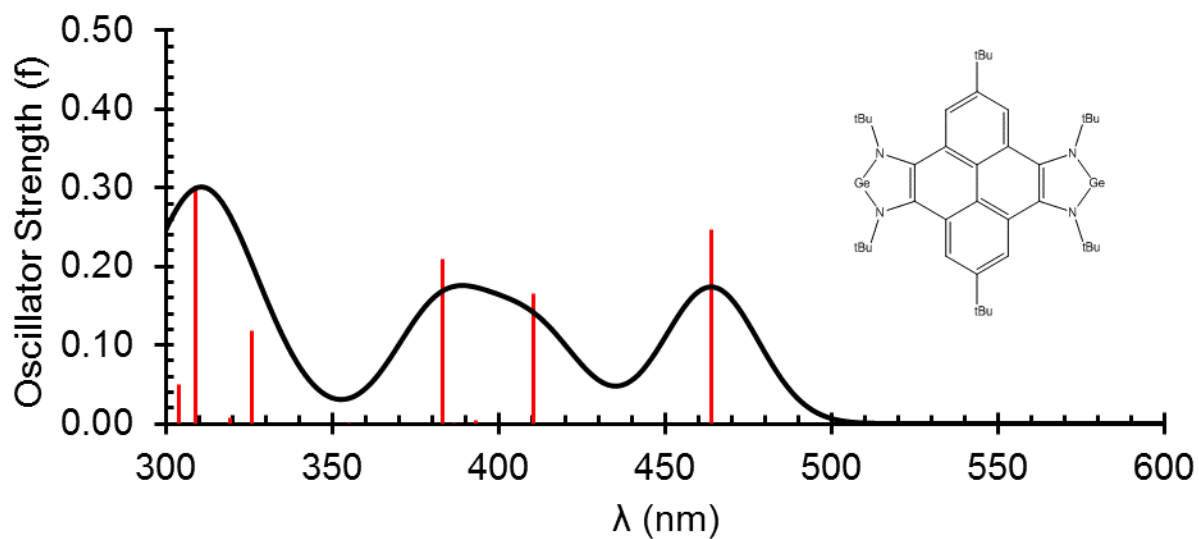

**Figure S18.** Simulated UV-vis absorption spectrum from TDDFT excitations for compound **2<sup>a</sup>**.

**Table S3.** Electronic transitions for the calculated transitions of **2<sup>a</sup>** and their orbital contributions.

| $\lambda$ (nm) | Character                              | % NTO Contribution |
|----------------|----------------------------------------|--------------------|
| 464            | $\pi \rightarrow \text{Ge } p + \pi^*$ | 98%                |
| 411            | $\pi \rightarrow \pi^*$                | 92%                |
| 383            | $\pi \rightarrow \text{Ge } p + \pi^*$ | 99%                |
| 309            | $\pi \rightarrow \pi^*$                | 52%                |
|                | $\pi \rightarrow \pi^*$                | 41%                |

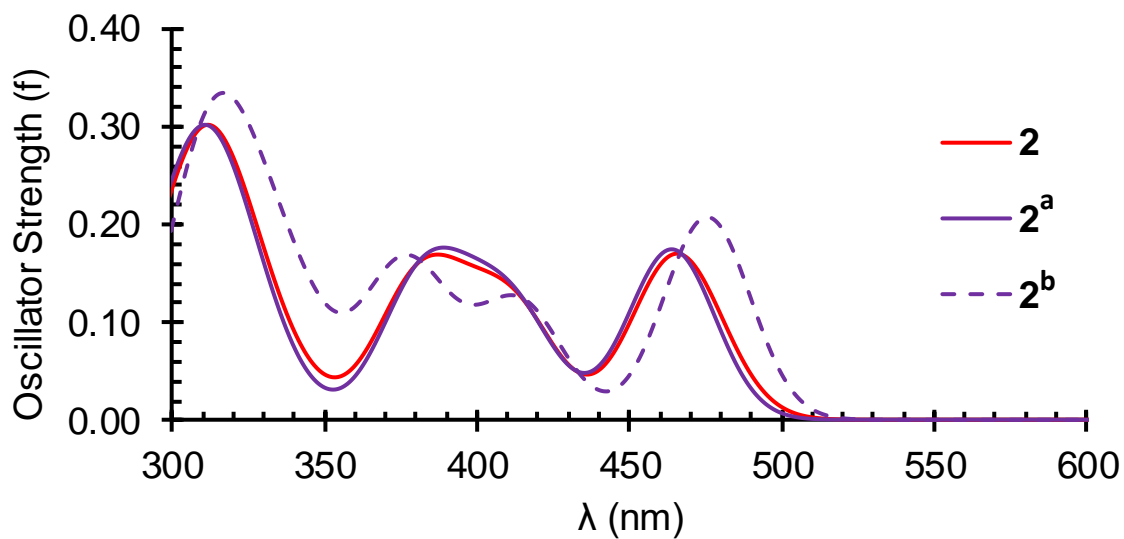

**Figure S19.** Spectral overlay for **2**, comprised of **2<sup>a</sup>** and **2<sup>b</sup>**, in which **2** is the weighted average simulated spectrum of **2<sup>a</sup>** and **2<sup>b</sup>** (**2<sup>a</sup>** and **2<sup>b</sup>** are low energy structures of **2**).

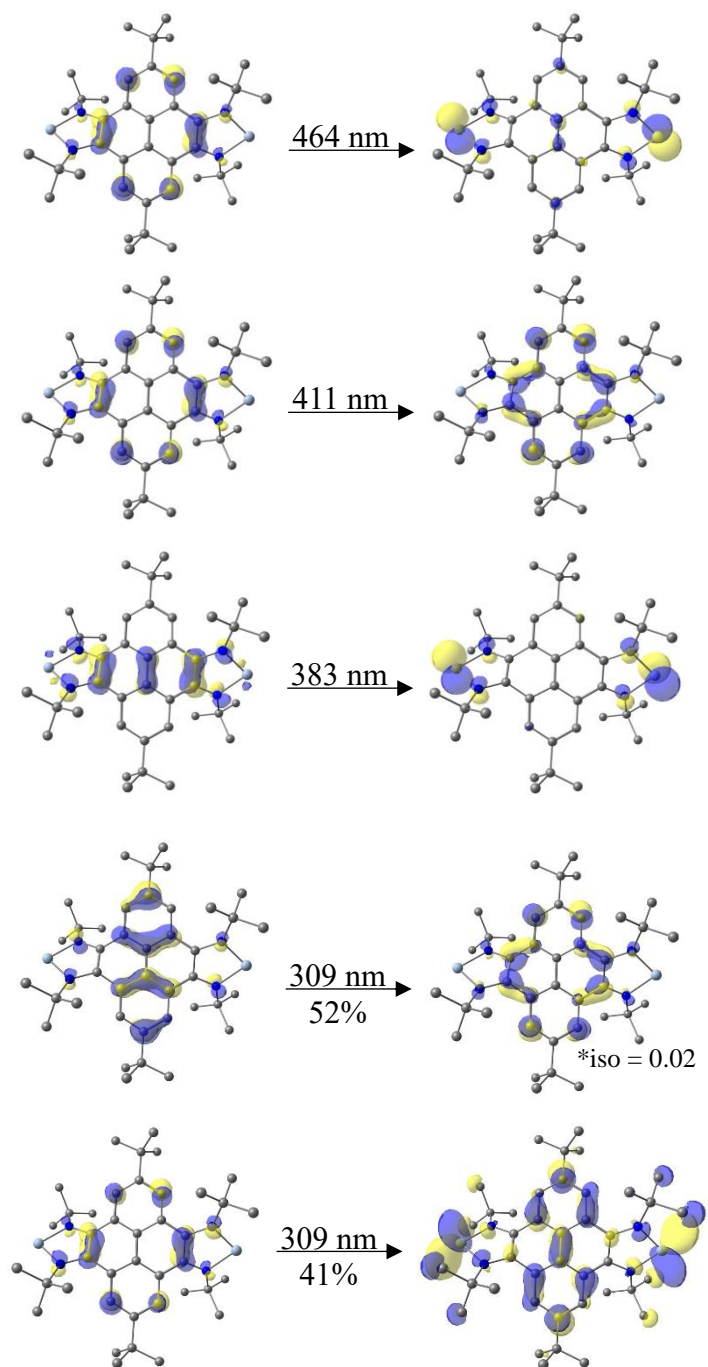

**Figure S20.** Natural Transition Orbitals (NTO) for the calculated transitions of **2<sup>a</sup>**.

## Output for TDDFT excitations for compound 2<sup>a</sup>

HOMO is 167

ES with  $f > 0.01$

Excited State 1: Singlet-A 2.6724 eV 463.94 nm 0.2463 <S\*\*2>=0.000  
 Excited State 3: Singlet-A 3.0202 eV 410.51 nm 0.1660 <S\*\*2>=0.000  
 Excited State 6: Singlet-A 3.2364 eV 383.10 nm 0.2088 <S\*\*2>=0.000  
 Excited State 9: Singlet-A 3.8057 eV 325.79 nm 0.1175 <S\*\*2>=0.000  
 Excited State 12: Singlet-A 4.0125 eV 309.00 nm 0.3017 <S\*\*2>=0.000  
 Excited State 14: Singlet-A 4.0813 eV 303.79 nm 0.0506 <S\*\*2>=0.000  
 Excited State 18: Singlet-A 4.4408 eV 279.19 nm 0.0465 <S\*\*2>=0.000  
 Excited State 20: Singlet-A 4.4737 eV 277.14 nm 0.0118 <S\*\*2>=0.000

|                                                                                                          |                                                                                                |                                         |
|----------------------------------------------------------------------------------------------------------|------------------------------------------------------------------------------------------------|-----------------------------------------|
| Excited State<br>167 ->168                                                                               | 1: Singlet-A<br>0.70098                                                                        | 2.6724 eV 463.94 nm 0.2463 <S**2>=0.000 |
| Excited State<br>165 ->168<br>167 ->170                                                                  | 3: Singlet-A<br>0.15969<br>0.67799                                                             | 3.0202 eV 410.51 nm 0.1660 <S**2>=0.000 |
| Excited State<br>166 ->169                                                                               | 6: Singlet-A<br>0.70267                                                                        | 3.2364 eV 383.10 nm 0.2088 <S**2>=0.000 |
| Excited State<br>165 ->168<br>167 ->170                                                                  | 9: Singlet-A<br>0.66981<br>-0.13868                                                            | 3.8057 eV 325.79 nm 0.1175 <S**2>=0.000 |
| Excited State<br>165 ->170<br>167 ->171<br>167 ->174                                                     | 12: Singlet-A<br>0.50746<br>-0.28504<br>-0.34784                                               | 4.0125 eV 309.00 nm 0.3017 <S**2>=0.000 |
| Excited State<br>165 ->170<br>166 ->172<br>166 ->173<br>167 ->171<br>167 ->174                           | 14: Singlet-A<br>0.30890<br>0.13547<br>0.11972<br>-0.16560<br>0.56747                          | 4.0813 eV 303.79 nm 0.0506 <S**2>=0.000 |
| Excited State<br>160 ->168<br>163 ->168<br>164 ->169<br>165 ->168<br>165 ->171<br>166 ->172<br>166 ->173 | 18: Singlet-A<br>-0.10646<br>0.15378<br>0.42484<br>-0.11946<br>-0.14776<br>-0.29580<br>0.36737 | 4.4408 eV 279.19 nm 0.0465 <S**2>=0.000 |
| Excited State<br>164 ->168                                                                               | 20: Singlet-A<br>0.67393                                                                       | 4.4737 eV 277.14 nm 0.0118 <S**2>=0.000 |

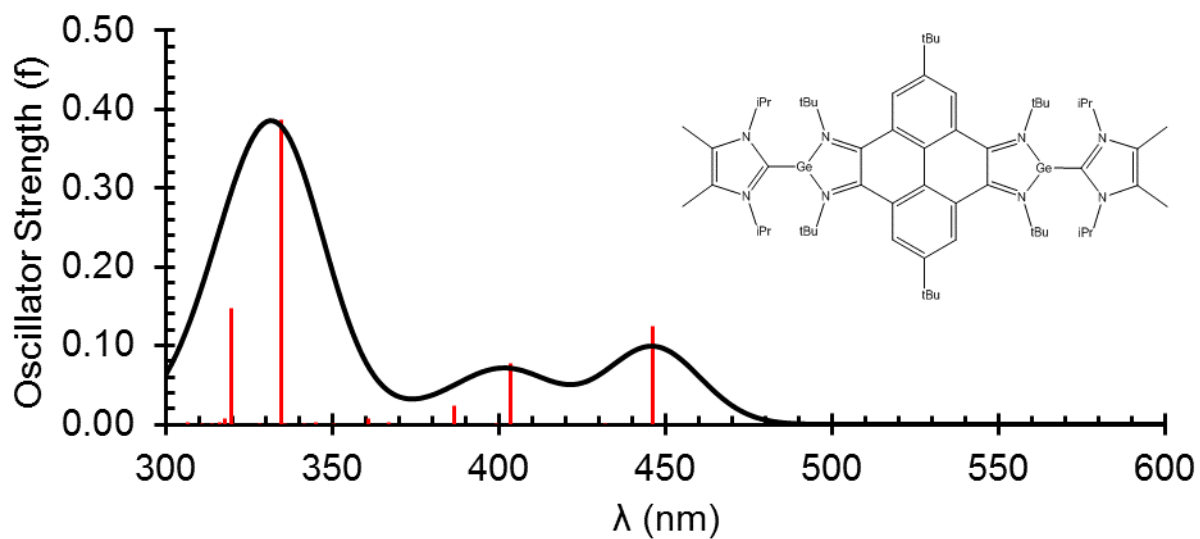

**Figure S21.** Simulated UV-vis absorption spectrum from TDDFT excitations for compound **3<sup>a</sup>**.

**Table S4.** Electronic transitions for the calculated transitions of **3<sup>a</sup>** and their orbital contributions.

| $\lambda$ (nm) | Character               | % NTO Contribution |
|----------------|-------------------------|--------------------|
| 446            | $\pi \rightarrow \pi^*$ | 96%                |
| 404            | $\pi \rightarrow \pi^*$ | 87%                |
| 335            | $\pi \rightarrow \pi^*$ | 81%                |

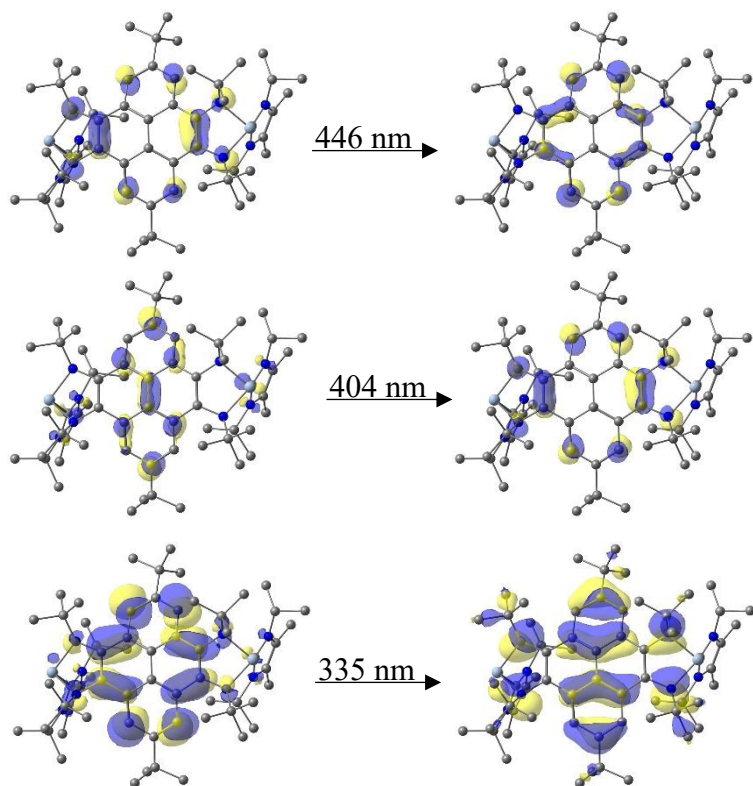

**Figure S22.** Natural Transition Orbitals (NTO) for the calculated transitions of **3<sup>a</sup>**.

## Output for TDDFT excitations for compound 3<sup>a</sup>

HOMO is 267

ES with  $f > 0.01$

Excited State 1: Singlet-A 2.7802 eV 445.96 nm 0.1253 <S\*\*2>=0.000  
Excited State 3: Singlet-A 3.0722 eV 403.57 nm 0.0775 <S\*\*2>=0.000  
Excited State 5: Singlet-A 3.2074 eV 386.55 nm 0.0232 <S\*\*2>=0.000  
Excited State 12: Singlet-A 3.7042 eV 334.71 nm 0.3859 <S\*\*2>=0.000  
Excited State 15: Singlet-A 3.8800 eV 319.55 nm 0.1472 <S\*\*2>=0.000

Excited State 1: Singlet-A 2.7802 eV 445.96 nm 0.1253 <S\*\*2>=0.000  
267 -> 268 0.68224

Excited State 3: Singlet-A 3.0722 eV 403.57 nm 0.0775 <S\*\*2>=0.000  
263 -> 268 0.19711  
266 -> 269 -0.12537  
267 -> 270 0.62347  
267 -> 271 -0.21467

Excited State 5: Singlet-A 3.2074 eV 386.55 nm 0.0232 <S\*\*2>=0.000  
263 -> 268 -0.14752  
266 -> 269 -0.25054  
267 -> 268 0.10456  
267 -> 270 0.19795  
267 -> 271 0.59571

Excited State 12: Singlet-A 3.7042 eV 334.71 nm 0.3859 <S\*\*2>=0.000  
263 -> 268 0.63056  
267 -> 270 -0.11125  
267 -> 271 0.19929

Excited State 15: Singlet-A 3.8800 eV 319.55 nm 0.1472 <S\*\*2>=0.000  
262 -> 268 -0.17992  
264 -> 270 0.37277  
264 -> 271 0.18752  
265 -> 269 0.51094

## Nucleus Independent Chemical Shifts

NICS(0) values (B3LYP/BS2):

|                 | <b>1</b> |
|-----------------|----------|
| Bq <sup>2</sup> | −3.89    |
| Bq <sup>3</sup> | −10.66   |
| Bq <sup>4</sup> | −3.95    |
| Bq <sup>5</sup> | −10.45   |

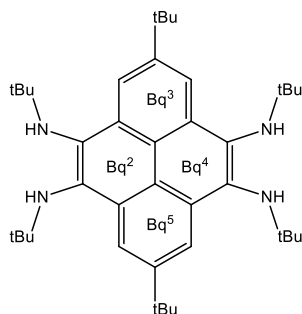

**Figure S23.** NICS(0) values for **1**.

|                 | <b>2</b> | <b>2<sup>a</sup></b> | <b>2-H</b> |
|-----------------|----------|----------------------|------------|
| Bq <sup>1</sup> | −5.90    | −5.85                | −7.91      |
| Bq <sup>2</sup> | −3.66    | −3.02                | −4.91      |
| Bq <sup>3</sup> | −9.98    | −10.11               | −11.52     |
| Bq <sup>4</sup> | −2.86    | −3.74                | −4.92      |
| Bq <sup>5</sup> | −9.99    | −10.11               | −11.52     |
| Bq <sup>6</sup> | −5.83    | −5.84                | −7.91      |

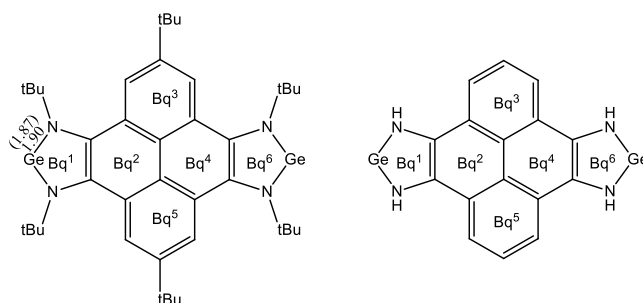

(Expt) and computed distances of Ge-N bond given in Å.

**Figure S24.** NICS(0) values for **2**, **2<sup>a</sup>** (low energy isomer of **2**), and **2-H** (where *tert*-butyl groups were replaced with hydrogens).

|                 | <b>3</b> | <b>3-H</b> |
|-----------------|----------|------------|
| Bq <sup>1</sup> | −0.56    | −2.57      |
| Bq <sup>2</sup> | −3.87    | −5.20      |
| Bq <sup>3</sup> | −10.26   | −10.45     |
| Bq <sup>4</sup> | −3.87    | −5.10      |
| Bq <sup>5</sup> | −10.26   | −10.27     |
| Bq <sup>6</sup> | −0.56    | −2.44      |
| Bq <sup>7</sup> | −11.83   | −12.51     |
| Bq <sup>8</sup> | −11.83   | −12.49     |

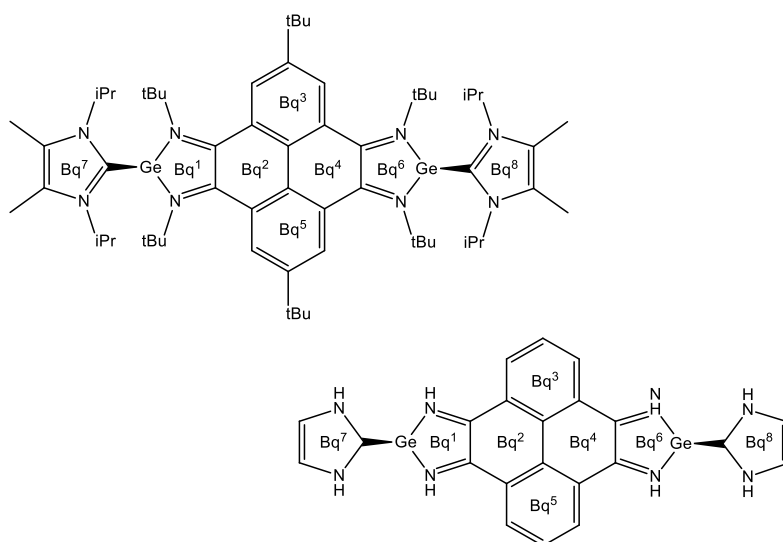

**Figure S25.** NICS(0) values for **3** and **3-H** (where *iso*-propyl and *tert*-butyl groups were replaced with hydrogens).



**Benzene (B)**

|                 |       |
|-----------------|-------|
| Bq <sup>1</sup> | -8.06 |
|-----------------|-------|

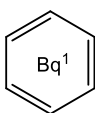**Anthracene (A)**

|                 |        |
|-----------------|--------|
| Bq <sup>1</sup> | -7.49  |
| Bq <sup>2</sup> | -11.30 |
| Bq <sup>3</sup> | -7.52  |

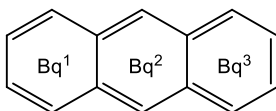**Naphthalene (N)**

|                 |       |
|-----------------|-------|
| Bq <sup>1</sup> | -8.54 |
| Bq <sup>2</sup> | -8.54 |

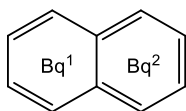**Phenanthrene (Phen)**

|                 |       |
|-----------------|-------|
| Bq <sup>1</sup> | -8.57 |
| Bq <sup>2</sup> | -5.69 |
| Bq <sup>3</sup> | -8.61 |

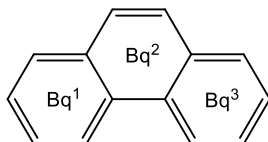**Pyrene (Pn)**

|                 |        |
|-----------------|--------|
| Bq <sup>1</sup> | -11.40 |
| Bq <sup>2</sup> | -3.99  |
| Bq <sup>3</sup> | -11.38 |
| Bq <sup>4</sup> | -4.03  |

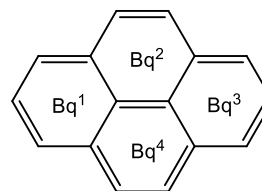**JUTPIX (JX)<sup>28</sup>**

|                 |       |
|-----------------|-------|
| Bq <sup>1</sup> | -2.63 |
|-----------------|-------|

(Expt) and computed distances of Ge-N bond given in Å.

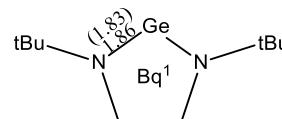**JUTPOD (JD)<sup>28</sup>**

|                 |       |
|-----------------|-------|
| Bq <sup>1</sup> | -8.74 |
|-----------------|-------|

(Expt) and computed distances of Ge-N bond given in Å.

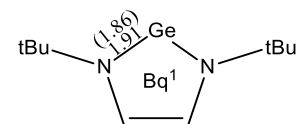**Pyrene-fused NHC (Pn<sub>NHC</sub>)**

|                 |        |
|-----------------|--------|
| Bq <sup>1</sup> | -9.40  |
| Bq <sup>2</sup> | -5.34  |
| Bq <sup>3</sup> | -10.65 |
| Bq <sup>4</sup> | -5.34  |
| Bq <sup>5</sup> | -10.65 |
| Bq <sup>6</sup> | -9.40  |

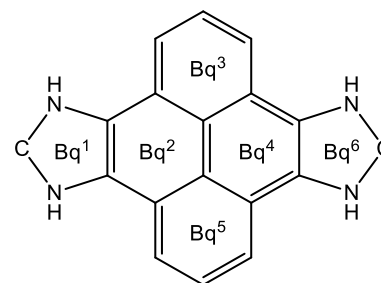

**Figure S26.** NICS(0) values for comparable aromatics and germylenes.

**Table S5.** Comparison of NICS(0) values of the reported germylenes and aromatic compounds.

|                 | <b>1</b> | <b>2</b> | <b>2<sup>a</sup></b> | <b>2-H</b> | <b>3</b> | <b>3-H</b> | <b>B</b> | <b>A</b> | <b>N</b> | <b>Phen</b> | <b>Pn</b> | <b>JX</b> | <b>JD</b> | <b>Pn<sub>NHC</sub></b> |
|-----------------|----------|----------|----------------------|------------|----------|------------|----------|----------|----------|-------------|-----------|-----------|-----------|-------------------------|
| Bq <sup>1</sup> | n.a.     | -5.90    | -5.85                | -7.91      | -0.56    | -2.57      | -8.06    | -7.49    | -8.54    | -8.57       | -11.40    | -2.63     | -8.74     | -9.40                   |
| Bq <sup>2</sup> | -3.89    | -3.66    | -3.02                | -4.91      | -3.87    | -5.20      | n.a.     | -11.30   | -8.54    | -5.69       | -3.99     | n.a.      | n.a.      | -5.34                   |
| Bq <sup>3</sup> | -10.66   | -9.98    | -10.11               | -11.52     | -10.26   | -10.45     | n.a.     | -7.52    | n.a.     | -8.61       | -11.38    | n.a.      | n.a.      | -10.65                  |
| Bq <sup>4</sup> | -3.95    | -2.86    | -3.74                | -4.92      | -3.87    | -5.10      | n.a.     | n.a.     | n.a.     | n.a.        | -4.03     | n.a.      | n.a.      | -5.34                   |
| Bq <sup>5</sup> | -10.45   | -9.99    | -10.11               | -11.52     | -10.26   | -10.27     | n.a.     | n.a.     | n.a.     | n.a.        | n.a.      | n.a.      | n.a.      | -10.65                  |
| Bq <sup>6</sup> | n.a.     | -5.83    | -5.84                | -7.91      | -0.56    | -2.44      | n.a.     | n.a.     | n.a.     | n.a.        | n.a.      | n.a.      | n.a.      | -9.40                   |
| Bq <sup>7</sup> | n.a.     | n.a.     | n.a.                 | n.a.       | -11.83   | -12.51     | n.a.     | n.a.     | n.a.     | n.a.        | n.a.      | n.a.      | n.a.      | n.a.                    |
| Bq <sup>8</sup> | n.a.     | n.a.     | n.a.                 | n.a.       | -11.83   | -12.49     | n.a.     | n.a.     | n.a.     | n.a.        | n.a.      | n.a.      | n.a.      | n.a.                    |

*\*Note: A more coarse grid leads to numerical instabilities in the NICS(0) values for NICS(0) values that should be numerically identical by symmetry.*

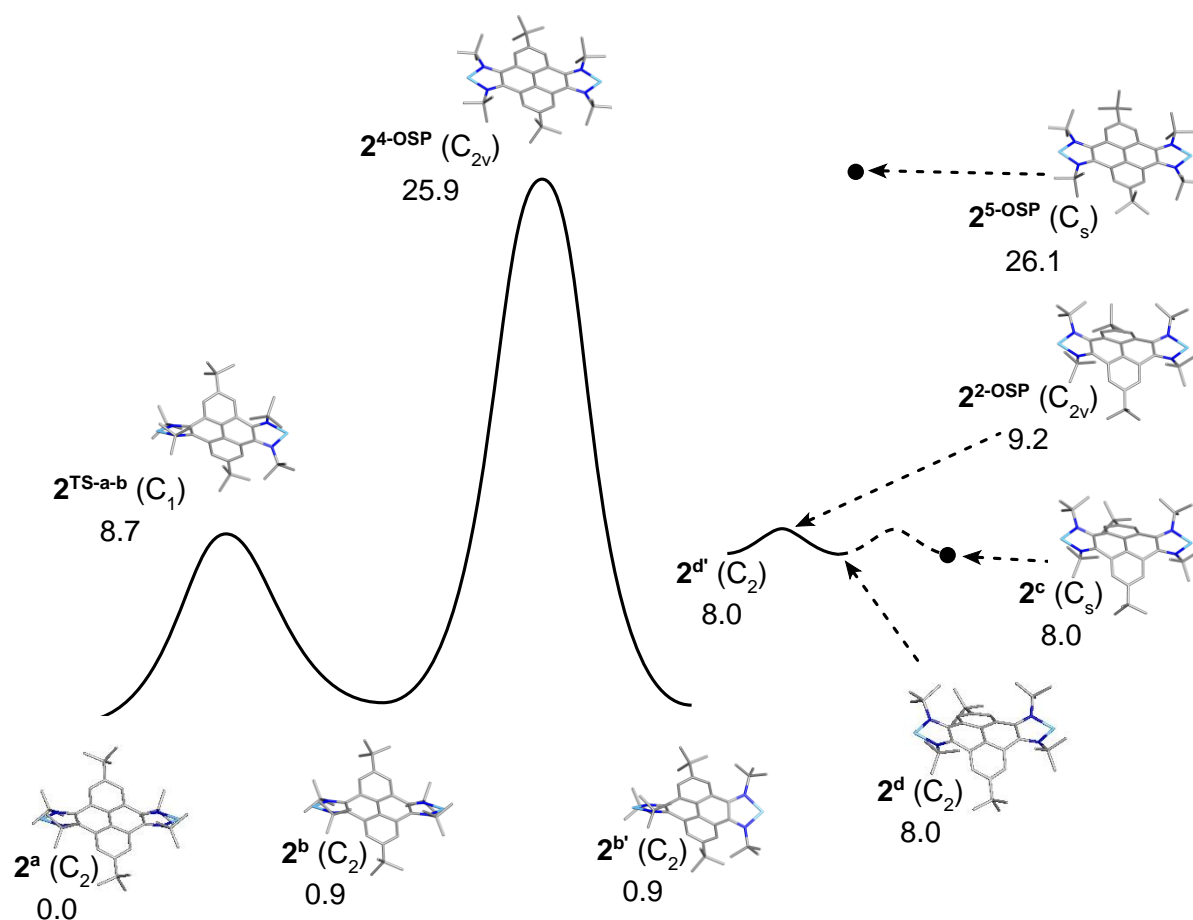

**Figure S27.** Potential Energy Surface ( $\Delta E_e$ ) for **2**. All energies reported in kcal mol<sup>-1</sup>.

The potential energy surface above depicts various fluxional and higher-energy processes for compound **2**. The two lowest-energy structures for compound **2** are **2<sup>a</sup>** and **2<sup>b</sup>**. Structures **2<sup>a</sup>** and **2<sup>b</sup>** are connected by a low-energy transition state **2<sup>TS-a-b</sup>**. While both **2<sup>a</sup>** and **2<sup>b</sup>** are  $C_2$  symmetric, **2<sup>a</sup>** has the same "twisting" of the germylene units where those units are staggered as observed in the geometry of the X-ray crystal structure. In **2<sup>b</sup>**, the germylene units are eclipsed, i.e., they are rotating in the same direction. Structures **2<sup>b</sup>** and **2<sup>b'</sup>** are mirror images that are connected by a high-energy  $C_{2v}$ -symmetric fourth-order saddle point (**2<sup>4-OSP</sup>**). Structures **2<sup>c</sup>** and **2<sup>d</sup>** are relatively low-energy  $C_s$ - and  $C_2$ -symmetric local minima, respectively, that buckle the pyrene core to form bowl-shaped structures, as opposed to the twisting of the pyrene in **2<sup>a</sup>**. The only difference between **2<sup>c</sup>** and **2<sup>d</sup>** is a low-energy *t*-butyl rotation. It is notable that the structure of **2<sup>c</sup>** is similar to the Ge-pyrene core part of the geometry of **3<sup>6-OSP</sup>**. Two other higher-order saddle points (**2<sup>2-OSP</sup>** and **2<sup>5-OSP</sup>**) exist, and the relative energy of **2<sup>2-OSP</sup>** is only 9.2 kcal mol<sup>-1</sup> above the lowest energy structure **2<sup>a</sup>**. Structure **2<sup>2-OSP</sup>** connects mirror image enantiomers of **2<sup>d</sup>** and **2<sup>d'</sup>**. Structure **2<sup>5-OSP</sup>** is 26.1 kcal mol<sup>-1</sup> above **2<sup>a</sup>**.

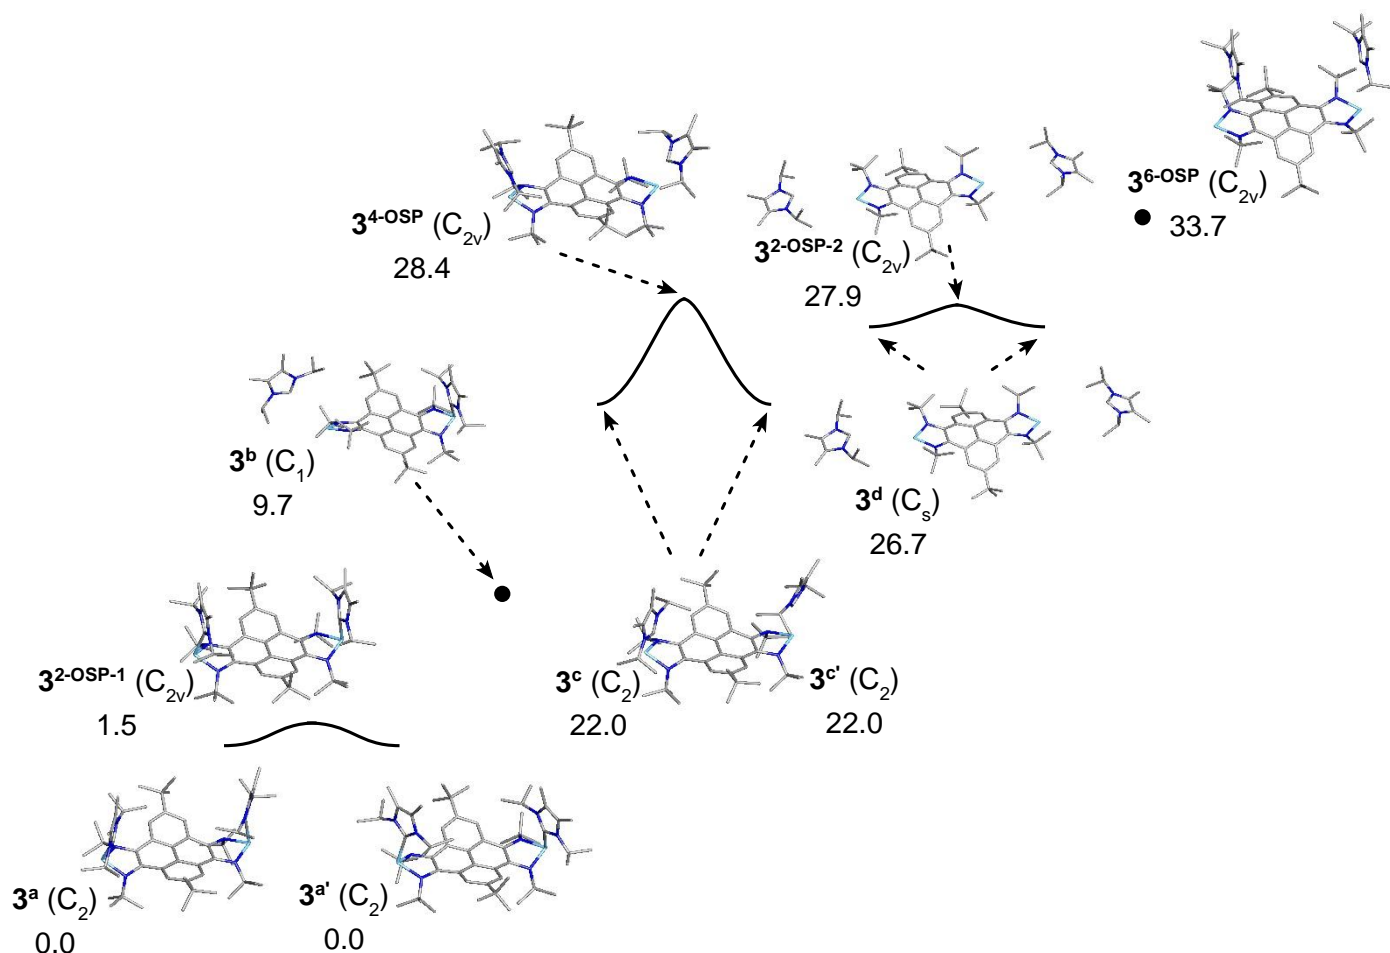

**Figure S28.** Potential Energy Surface for **3** ( $\Delta E_e$ ). All energies reported in kcal mol<sup>-1</sup>.

The potential energy surface above depicts various fluxional and higher-energy processes for compound **3**. The lowest-energy structure for compound **3** is **3<sup>a</sup>**, which has C<sub>NHC</sub>-Ge distances of 2.21 Å. Structure **3<sup>2-OSP-1</sup>** is a low-energy C<sub>2v</sub>-symmetric second-order saddle point that connects two enantiomeric C<sub>2</sub> structures (**3<sup>a</sup>** and **3<sup>a'</sup>**). Structure **3<sup>b</sup>** is C<sub>1</sub>-symmetric where one of the NHCs has significantly lengthened away from the Ge-pyrene core (C<sub>NHC</sub>-Ge distance of 4.12 Å), while the other NHC remains bound to the second germylene (C<sub>NHC</sub>-Ge distance of 2.21 Å). Structures **3<sup>c</sup>** and **3<sup>c'</sup>** are high-energy local minimum enantiomers (C<sub>NHC</sub>-Ge distances of 2.51 Å) that are connected through a fourth-order saddle point (**3<sup>4-OSP</sup>** in which the Ge-C<sub>NHC</sub> distances are 2.56 Å) by the double rotation of the NHCs about the Ge-C<sub>NHC</sub> bond. Structure **3<sup>d</sup>** is a C<sub>s</sub>-symmetric structure in which both NHCs are significantly lengthened away from the Ge-pyrene core (C<sub>NHC</sub>-Ge distances of 5.68 Å). A high-energy second-order saddle point (**3<sup>2-OSP-2</sup>**) connects two equivalent structures of **3<sup>d</sup>** through a motion of *t*-butyl rotation. Structure **3<sup>6-OSP</sup>** is a C<sub>2v</sub>-symmetric high-energy sixth-order saddle point with significantly lengthened C<sub>NHC</sub>-Ge distances of 5.59 Å. Interestingly, the geometry of the Ge-pyrene core in **3<sup>6-OSP</sup>** has a strong resemblance to the geometry observed in **2<sup>d</sup>** (see overlay, *vide infra*).

**Table S6.**  $\Delta E_e$  and  $\Delta G$  of **2** and **3** (kcal mol<sup>-1</sup>).

|                            | $\Delta E_e$ | $\Delta G$ |
|----------------------------|--------------|------------|
| <b>2<sup>a</sup></b>       | 0.0          | 0.0        |
| <b>2<sup>TS-a-b</sup></b>  | 8.7          | 9.4        |
| <b>2<sup>b</sup></b>       | 0.9          | 0.4        |
| <b>2<sup>4-OSP</sup></b>   | 26.0         | 34.6       |
| <b>2<sup>b'</sup></b>      | 0.9          | 0.4        |
| <b>2<sup>c</sup></b>       | 8.0          | 6.8        |
| <b>2<sup>d</sup></b>       | 8.0          | 7.6        |
| <b>2<sup>2-OSP</sup></b>   | 9.2          | 9.8        |
| <b>2<sup>d'</sup></b>      | 8.0          | 7.6        |
| <b>2<sup>5-OSP</sup></b>   | 26.1         | 34.9       |
| <b>3<sup>a</sup></b>       | 0.0          | 0.0        |
| <b>3<sup>2-OSP-1</sup></b> | 1.5          | 4.6        |
| <b>3<sup>a'</sup></b>      | 0.0          | 0.0        |
| <b>3<sup>b</sup></b>       | 9.7          | 3.4        |
| <b>3<sup>c</sup></b>       | 22.0         | 21.9       |
| <b>3<sup>4-OSP</sup></b>   | 28.4         | 31.2       |
| <b>3<sup>c'</sup></b>      | 22.0         | 21.9       |
| <b>3<sup>d</sup></b>       | 26.7         | 3.4        |
| <b>3<sup>2-OSP-2</sup></b> | 27.9         | 6.9        |
| <b>3<sup>6-OSP</sup></b>   | 33.7         | 27.4       |

The above data tabulates the  $\Delta E_e$  and  $\Delta G$  of **2** and **3** in kcal mol<sup>-1</sup>. Because the Ge-pyrene core of structures **2<sup>2-OSP</sup>** and **3<sup>6-OSP</sup>** are quite geometrically similar, it is interesting to compare the relative energetics to their respective lowest-energy structures. Structure **2<sup>2-OSP</sup>** is only 9.8 kcal mol<sup>-1</sup> higher in energy than **2<sup>a</sup>** while structure **3<sup>6-OSP</sup>** is 27.4 kcal mol<sup>-1</sup> higher than **3<sup>a</sup>**. This difference in energy indicates that the Ge-bound NHCs in **3** significantly increase the activation energy of the fluxional processes of **3**. It should be noted that the  $\Delta G$  values of **3<sup>d</sup>** and **3<sup>2-OSP-2</sup>** are artificially significantly lower than their corresponding  $\Delta E_e$  values because of the large separation between the units in the computation (two NHCs and the Ge-containing pyrene core), making the system more entropically favored, but still higher in energy than **3<sup>a</sup>**.

## Structural Comparisons

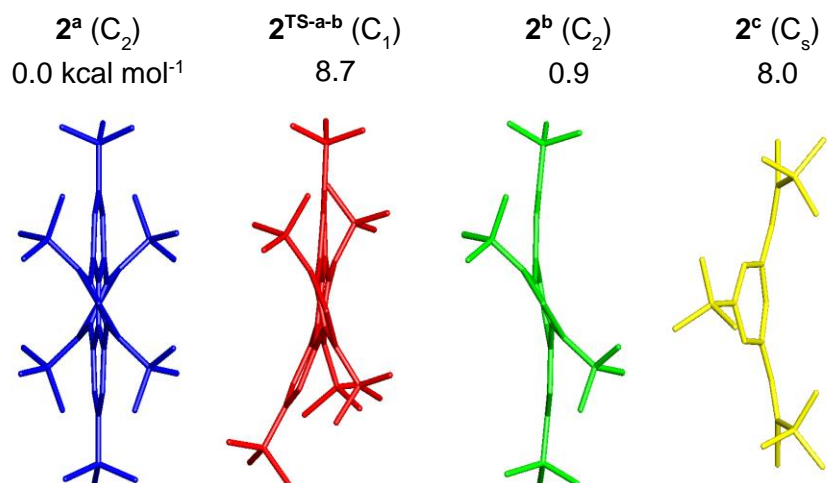

**Figure S29.** Structural comparison of  $2^a$  (blue),  $2^{TS-a-b}$  (red),  $2^b$  (green), and  $2^c$  (yellow) with a view down the axis containing the two Ge. Hydrogen atoms not shown for clarity.

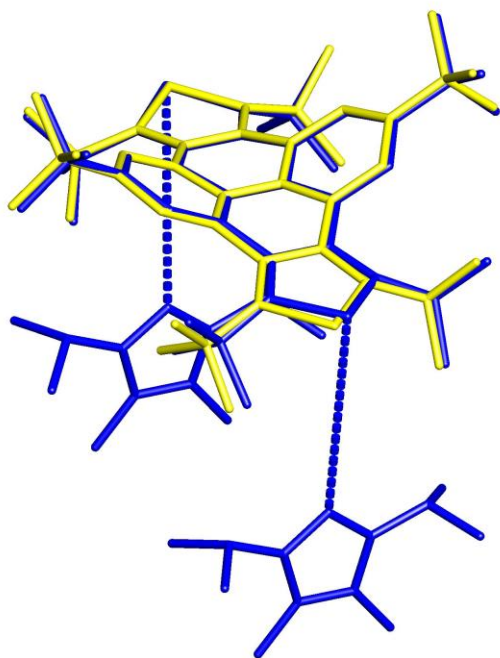

**Figure S30.** Structural overlay comparing  $2^{2-OSP}$  (yellow) and  $3^{6-OSP}$  (blue). In  $3^{6-OSP}$ , the Ge-C<sub>NHC</sub> distance is quite long at 5.59 Å.

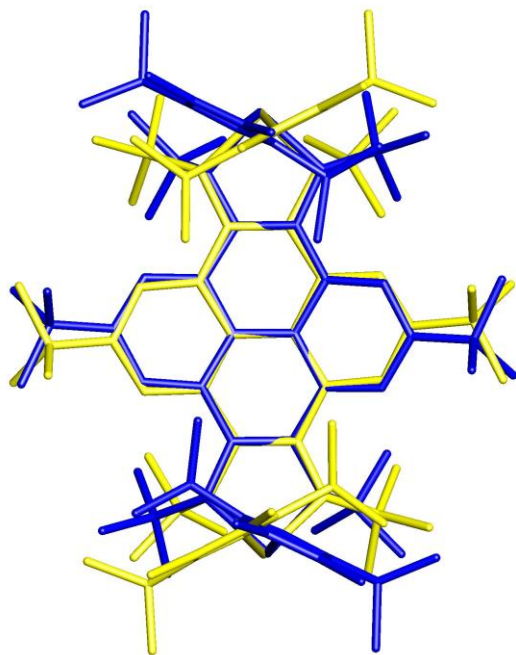

**Figure S31.** Structural overlay of the mirror image structures **3<sup>a</sup>** (blue) and **3<sup>a'</sup>** (yellow).

## References

1. A. J. Arduengo, R. Krafczyk, R. Schmutzler, H. A. Craig, J. R. Goerlich, W. J. Marshall and M. Unverzagt, *Tetrahedron*, 1999, **55**, 14523-14534.
2. Z. H. Wu, Z. T. Huang, R. X. Guo, C. L. Sun, L. C. Chen, B. Sun, Z. F. Shi, X. Shao, H. Li and H. L. Zhang, *Angew. Chem. Int. Ed.*, 2017, **56**, 13031-13035.
3. N. Kuhn and T. Kratz, *Synthesis*, 1993, **1993**, 561-562.
4. Bruker (2012). *Saint; SADABS; APEX3*. Bruker AXS Inc., Madison, Wisconsin, USA.
5. Sheldrick, G. M. (2015). *Acta Cryst. A* **71**, 3-8.
6. Dolomanov, O. V.; Bourhis, L. J.; Gildea, R. J.; Howard, J. A. K.; Puschmann, H. *J. Appl. Cryst.* (2009). **42**, 339-341.
7. Spek, A. L. *Acta Crystallogr. Sect C: Struct. Chem.* **2015**, *C71*, 9-18.
8. M. J. Frisch, G. W. Trucks, H. B. Schlegel, G. E. Scuseria, M. A. Robb, J. R. Cheeseman, G. Scalmani, V. Barone, G. A. Petersson, H. Nakatsuji, X. Li, M. Caricato, A. V. Marenich, J. Bloino, B. G. Janesko, R. Gomperts, B. Mennucci, H. P. Hratchian, J. V., and D. J. F. Gaussian 16, Revision B.01. Gaussian, Inc: Wallingford, CT 2016.
9. Hariharan, P. C., and Pople, J. A. *Theor. Chim. Acta* **1973**, *28*, 213–222.
10. Hehre, W. J., Ditchfield, R., and Pople, J. A. *J. Chem. Phys.* **1972**, *56* (5), 2257–2261.
11. Petersson, G. A., and Al-Laham, M. A. *J. Chem. Phys.* **1991**, *94*, 6081–6090.
12. Check, C. E.; Faust, T. O.; Bailey, J. M.; Wright, B. J.; Gilbert, T. M.; Sunderlin, L. S. *J. Phys. Chem. A* **2001**, *105*.
13. Wadt, W. R.; Hay, P. J. *J. Chem. Phys.* **1985**, *82*.
14. Clark, T.; Chandrasekhar, J.; Spitznagel, G. W.; Schleyer, P. V. R. *J. Comput. Chem.* **1983**, *4* (3), 294–301.
15. Krishnan, R.; Binkley, J. S.; Seeger, R.; Pople, J. *J. Chem. Phys.* **1980**, *72* (1), 650–654.
16. Curtiss, L. A.; McGrath, M. P.; Blaudeau, J.-P.; Davis, N. E.; Binning, R. C.; Radom, L. *J. Chem. Phys.* **1995**, *103*.
17. Schleyer, P. von R.; Maerker, C.; Dransfeld, A.; Jiao, H.; van Eikema Hommes, N. J. R. *J. Am. Chem. Soc.* **1996**, *118* (26), 6317–6318.
18. James R. Cheeseman, Gary W. Trucks, T. A. K.; Frisch, M. J. *J. Chem. Phys.* **1996**, *104*, 5497.
19. McWeeny, R. *Phys. Rev.* **1962**, *126* (3), 1028–1034.
20. Ditchfield, R. *Mol. Phys.* **1974**, *27* (4), 789–807.
21. Wolinski, K.; Hinton, J. F.; Pulay, P. *J. Am. Chem. Soc.* **1990**, *112* (23), 8251–8260.
22. A. D. Becke. *J. Chem. Phys.* **1993**, *98*, 5648.



23. Lee, C.; Yang, W.; Parr, R. G. *Phys. Rev. B* **1988**, 37 (2), 785–789.
24. Marques, M. A. L.; Gross, E. K. U. *Annu. Rev. Phys. Chem.* **2004**, 55 (1), 427–455.
25. Hall, M. B.; Fenske, R. F. *Inorg. Chem.* **1972**, 11 (4), 768–775.
26. Bursten, B. E.; Jensen, J. R.; Fenske, R. F. *J. Chem. Phys.* **1978**, 68, 3320.
27. Manson, J.; Webster, C. E.; Perez, L. M.; Hall, M. B. JIMP 2. <https://www.chem.tamu.edu/jimp2/>
28. Herrmann, W. A.; Denk, M.; Behm, J.; Scherer, W.; Klingan, F.-R.; Bock, H.; Solouki, B.; Wagner, M. *Angew. Chemie Int. Ed. English* **1992**, 31 (11), 1485–1488.
